# Supplementary material for: Circulating Small RNA Profiling of Patients with Alveolar and Cystic Echinococcosis
Source: Biology (Basel). 2023 May 13;12(5):715. doi: 10.3390/biology12050715 (PMC10215812; doi:10.3390/biology12050715)
Supplement: Supplementary file 1 [file biology-12-00715-s001.zip › Supplementary Tables.xlsx]

## Sheet: Supp Table S1
Supplementary Table S1. Number of counts corresponding to raw and processed reads.
Patient Group	Patient Number	Library name	Raw read counts	Processed read counts	Reads mapping ambiguously	Percentage of reads mapping ambiguously	Mapped reads (Hsa)	Percentage of mapped reads (Hsa)	Mapped reads (Emu/Egr)	Percentage of mapped reads (Emu/Egr)	Included in the analyses
AE Negative	1	30004-001.R1.fastq	22805151	9818682	78728	0.801818	4818015	50.18	116554	1.18706	Yes
AE Negative	2	30004-002.R1.fastq	25326516	8339520	104534	1.25348	2257285	28.9301	151881	1.82122	Yes
AE Negative	3	30004-003.R1.fastq	21060066	10514144	63123	0.600363	5951989	55.2555	90109	0.857026	Yes
AE Positive	4	30004-004.R1.fastq	22937643	8221002	67634	0.822698	3295260	40.7815	93430	1.13648	Yes
AE Positive	5	30004-005.R1.fastq	22168407	8485393	85519	1.00784	3748358	45.0443	116427	1.37209	Yes
AE Positive	6	30004-006.R1.fastq	17808368	5777346	52975	0.916944	1441905	38.2299	87026	1.50633	No
AE Treated	7	30004-007.R1.fastq	20925234	8297531	120064	1.44698	3809837	46.8901	186954	2.25313	No
AE Treated	8	30004-008.R1.fastq	20557186	8602253	192378	2.23637	945080	15.4324	367743	4.27496	Yes
AE Treated	9	30004-009.R1.fastq	22852734	8525896	108862	1.27684	1645212	24.1597	154325	1.81007	Yes
CE Negative	10	30004-010.R1.fastq	20391604	10451160	61728	0.590633	6697189	62.214	80631	0.771503	Yes
CE Negative	11	30004-011.R1.fastq	19447457	10793204	65815	0.609782	6298440	58.1387	87282	0.808676	Yes
CE Negative	12	30004-012.R1.fastq	21323291	12488347	70728	0.566352	9163970	67.6305	91957	0.736342	Yes
Non-parasitic cyst	13	30004-013.R1.fastq	19092063	9427541	69792	0.740299	6260170	57.8923	99002	1.05014	No
Non-parasitic cyst	14	30004-014.R1.fastq	22199150	11518118	76274	0.662209	7335038	63.4919	109078	0.947012	Yes
Non-parasitic cyst	15	30004-015.R1.fastq	18920441	8382796	71461	0.852472	3873566	47.0682	98519	1.17525	Yes
CE Positive (CE2)	16	30004-016.R1.fastq	21714985	14006134	74100	0.529054	9631781	70.6927	92153	0.657947	Yes
CE Positive (CE1)	17	30004-017.R1.fastq	21846659	13392565	73125	0.546012	5409501	39.703	122249	0.912812	Yes
CE Positive (CE2)	18	30004-018.R1.fastq	21643676	11999520	51912	0.432617	7654966	61.2353	77436	0.645326	Yes
CE Positive (CE3a)	19	30004-019.R1.fastq	19415616	11936689	60583	0.507536	7758080	65.3165	82435	0.690602	Yes
CE Positive (CE3a)	20	30004-020.R1.fastq	20921576	10018549	73432	0.73296	6197854	61.2726	107083	1.06885	No
CE Positive (CE3a)	21	30004-021.R1.fastq	21811559	11840031	60891	0.514281	7658453	62.5113	84077	0.710108	Yes
CE Positive (CE3b)	22	30004-022.R1.fastq	21552130	10439481	63538	0.608632	6380930	57.395	86806	0.831516	Yes
CE Positive (CE3b)	23	30004-023.R1.fastq	23475769	9881850	118915	1.20337	4017019	41.9478	161634	1.63567	Yes
CE Positive (CE3b)	24	30004-024.R1.fastq	19936297	9525136	82969	0.871053	4704460	49.2681	115828	1.21602	Yes
CE Positive (CE4)	25	30004-025.R1.fastq	21949114	10041858	72429	0.721271	5474011	52.8765	103363	1.02932	Yes
CE Positive (CE4)	26	30004-026.R1.fastq	22325137	10140881	74035	0.730065	5393792	52.6167	107166	1.05677	Yes
CE Positive (CE4)	27	30004-027.R1.fastq	20946892	10297623	101038	0.981178	6043546	56.2542	137050	1.33089	No
CE Positive (CE5)	28	30004-028.R1.fastq	21687488	11217657	94812	0.845203	7676322	61.1553	147704	1.31671	No
CE Positive (CE5)	29	30004-029.R1.fastq	20305864	8615702	81437	0.945216	3537097	40.943	111455	1.29363	Yes
CE Positive (CE5)	30	30004-030.R1.fastq	20053417	9635937	64439	0.668736	4896289	48.9406	93552	0.970866	Yes
CE Treated	31	30004-031.R1.fastq	19834578	12091155	59929	0.495643	7885969	64.1042	83758	0.692721	Yes
CE Treated	32	30004-032.R1.fastq	19929028	8667630	70966	0.818747	4198608	48.0201	96853	1.11741	Yes
CE Treated	33	30004-033.R1.fastq	18545652	11115765	52632	0.47349	7271264	70.0388	71723	0.645237	Yes

## Sheet: Supp Table S2
Supplementary Table S2. Data from reads mapping to human tRNAs.
								Most abundant sequence
Sample	Total tRNA read counts	Number of read counts mapping to tRNAGlu	Number of read counts mapping to tRNAGly	Number of read counts mapping to tRNAVal	Percentage of read counts mapping to tRNAGlu	Percentage of read counts mapping to tRNAGly	Percentage of read counts mapping to tRNAVal	tRNAGlu	tRNAGly	tRNAVal
AE_Negative_1	3426481	599926	2683877	91368	17.5085	78.3275	2.66653	TGGTGGTCTAGTGGTTAGGATTCGGCGCT	GCGCCGCTGGTGTAGTGGTATCATGCA	TCCGTAGTGTAGTGGTTATCACGTTCGCCT
AE_Negative_2	1180964	344558	769923	44443	29.176	65.1945	3.76328	TGGTGGTCTAGTGGTTAGGATTCGGCGCT	GCGCCGCTGGTGTAGTGGTATCATGCA	TCCGTAGTGTAGTGGTTATCACGTTCGCCT
AE_Negative_3	3628739	431286	3028939	127287	11.8853	83.4708	3.50775	TGGTGGTCTAGTGGTTAGGATTCGGCGCT	GCGCCGCTGGTGTAGTGGTATCATGCA	TCCGTAGTGTAGTGGTTATCACGTTCGCCT
AE_Positive_4	1548977	497183	829253	179591	32.0975	53.5355	11.5942	TGGTGGTCTAGTGGTTAGGATTCGGCGCT	GCGCCGCTGGTGTAGTGGTATCATGCA	TCCGTAGTGTAGTGGTTATCACGTTCGCCT
AE_Positive_5	2056554	1092900	682492	236579	53.1423	33.1862	11.5037	TGGTGGTCTAGTGGTTAGGATTCGGCGC	GCGCCGCTGGTGTAGTGGTATCATGCA	TCCGTAGTGTAGTGGTTATCACGTTCGCC
AE_Treated_8	471472	237277	140619	80343	50.3268	29.8255	17.0409	TGGTGGTCTAGTGGTTAGGATTCGGCGC	TGGTGGTTCAGTGGTAGAATTCTCGCCT	TCCGTAGTGTAGTGGTTATCACGTTCGCCT
AE_Treated_9	827860	589173	157637	48190	71.1682	19.0415	5.82103	TGGTGGTCTAGTGGTTAGGATTCGGCGCT	TGGTGGTTCAGTGGTAGAATTCTCGCCT	TCCGTAGTGTAGTGGTTATCACGTTCGCC
CE_Control_10	2602584	486689	1787404	294523	18.7002	68.6781	11.3166	TGGTGGTCTAGTGGTTAGGATTCGGCGC	GCGCCGCTGGTGTAGTGGTATCATGCAAGATT	TCCGTAGTGTAGTGGTTATCACGTTCGCC
CE_Control_11	2121686	467377	1357817	264978	22.0286	63.9971	12.489	TGGTGGTCTAGTGGTTAGGATTCGGCGC	GCGCCGCTGGTGTAGTGGTATCATGCAAGATT	TCCGTAGTGTAGTGGTTATCACGTTCGCC
CE_Control_12	4068739	670947	2646753	697550	16.4903	65.0509	17.1441	TGGTGGTCTAGTGGTTAGGATTCGGCGC	GCGCCGCTGGTGTAGTGGTATCATGCAAG	TCCGTAGTGTAGTGGTTATCACGTTCGC
NPL_14	3405461	214763	2793069	161351	6.30643	82.0174	4.73801	TGGTGGTCTAGTGGTTAGGATTCGGCG	GCGCCGCTGGTGTAGTGGTATCATGCA	TCCGTAGTGTAGTGGTTATCACGTTCGCC
NPL_15	2299729	760811	1201164	305119	33.0826	52.2307	13.2676	TGGTGGTCTAGTGGTTAGGATTCGGCG	GCGCCGCTGGTGTAGTGGTATCATGCA	TCCGTAGTGTAGTGGTTATCACGTTCGCC
CE1.2_16	3511142	756431	2298425	390243	21.5437	65.4609	11.1144	TGGTGGTCTAGTGGTTAGGATTCGGCG	GCGCCGCTGGTGTAGTGGTATCATGCAAGATT	TCCGTAGTGTAGTGGTTATCACGTTCGCC
CE1.2_17	2521931	253362	1859885	347877	10.0463	73.7484	13.7941	TGGTGGTCTAGTGGTTAGGATTCGGCGC	GCGCCGCTGGTGTAGTGGTATCATGCA	CTGTAGTGTAGTGGTTATCACGTTCGCCT
CE1.2_18	4177448	1173472	2354021	525917	28.0906	56.3507	12.5894	TGGTGGTCTAGTGGTTAGGATTCGGCG	GCGCCGCTGGTGTAGTGGTATCATGCA	TCCGTAGTGTAGTGGTTATCACGTTCGCC
CE3a_19	2720985	321299	2031718	316732	11.8082	74.6685	11.6403	TGGTGGTCTAGTGGTTAGGATTCGGCGC	GCGCCGCTGGTGTAGTGGTATCATGCAAGATT	TCCGTAGTGTAGTGGTTATCACGTTCGCC
CE3a_21	3136877	747753	2112344	230885	23.8375	67.3391	7.36035	TGGTGGTCTAGTGGTTAGGATTCGGCG	GCGCCGCTGGTGTAGTGGTATCATGCAAGATT	TCCGTAGTGTAGTGGTTATCACGTTCGCC
CE3b_22	2524297	631858	1664532	202754	25.031	65.9404	8.0321	TGGTGGTCTAGTGGTTAGGATTCGGCG	GCGCCGCTGGTGTAGTGGTATCATGCAAGATT	TCCGTAGTGTAGTGGTTATCACGTTCGCC
CE3b_23	1294070	209467	959009	95603	16.1867	74.108	7.38778	TGGTGGTCTAGTGGTTAGGATTCGGCGCT	GCGCCGCTGGTGTAGTGGTATCATGCA	TCCGTAGTGTAGTGGTTATCACGTTCGCCT
CE3b_24	1946351	296623	1506585	119442	15.24	77.4056	6.13671	TGGTGGTCTAGTGGTTAGGATTCGGCGC	GCGCCGCTGGTGTAGTGGTATCATGCAAGATT	TCCGTAGTGTAGTGGTTATCACGTTCGCCT
CE4_25	2446424	360319	1798945	232186	14.7284	73.5337	9.49083	TGGTGGTCTAGTGGTTAGGATTCGGCGC	GCGCCGCTGGTGTAGTGGTATCATGCA	TCCGTAGTGTAGTGGTTATCACGTTCGCC
CE4_26	2620510	406973	1987398	163958	15.5303	75.8401	6.25672	TGGTGGTCTAGTGGTTAGGATTCGGCG	GCGCCGCTGGTGTAGTGGTATCATGCAAGATT	TCCGTAGTGTAGTGGTTATCACGTTCGCC
CE5_29	1156545	167802	874081	101498	14.5089	75.5769	8.77597	TGGTGGTCTAGTGGTTAGGATTCGGCGC	GCGCCGCTGGTGTAGTGGTATCATGCAAGATT	TCCGTAGTGTAGTGGTTATCACGTTCGCC
CE5_30	1646804	323757	1078917	204202	19.6597	65.5158	12.3999	TGGTGGTCTAGTGGTTAGGATTCGGCGCT	GCGCCGCTGGTGTAGTGGTATCATGCAAGATT	TCCGTAGTGTAGTGGTTATCACGTTCGCC
CE_Treated_31	4318263	935258	2383577	893238	21.6582	55.1976	20.6851	TGGTGGTCTAGTGGTTAGGATTCGGCG	GCGCCGCTGGTGTAGTGGTATCATGCAAGATT	CTGTAGTGTAGTGGTTATCACGTTCGCCT
CE_Treated_32	1161698	307956	744847	87356	26.5091	64.1171	7.51968	TGGTGGTCTAGTGGTTAGGATTCGGCG	GCGCCGCTGGTGTAGTGGTATCATGCAAGATT	TCCGTAGTGTAGTGGTTATCACGTTCGCCT
CE_Treated_33	2643910	107311	2261808	230830	4.0588	85.5478	8.73063	TGGTGGTCTAGTGGTTAGGATTCGGCG	GCGCCGCTGGTGTAGTGGTATCATGCAAGATT	TCCGTAGTGTAGTGGTTATCACGTTCGCC

## Sheet: Supp Table S3
Supplementary Table S3. Number of read counts mapping to human hY-RNA and miR-1246/U2 snRNA.
Sample	Total YRNA read counts	URS0000188F7D_9606_Homo_sapiens_(human)_scRNA-hY4_RNA read counts	URS0000188F7D_9606_Homo_sapiens_(human)_scRNA-hY4_RNA (positions 70 - 93 nt) read counts	Total snRNA read counts	miR-1246/URS0000A90D33_9606_Homo_sapiens_(human)_snRNA_AC024051.12 read counts	miR-1246/URS0000A90D33_9606_Homo_sapiens_(human)_snRNA_AC024051.12 (position 94-116 nt) read counts
AE_Negative_1	93194	69961	50648	18151	16059	13627
AE_Negative_2	64819	44897	33283	8861	7900	6403
AE_Negative_3	205572	157717	119596	10166	8593	6681
AE_Positive_4	67875	47550	34927	65815	59002	52423
AE_Positive_5	37233	28313	19162	40982	31258	24704
AE_Treated_8	24543	16113	10628	8515	7728	4626
AE_Treated_9	22459	13423	9934	17231	16182	11998
CE_Control_10	415598	276629	242030	9327	7453	4849
CE_Control_11	384223	266532	235659	12645	5952	3997
CE_Control_12	157379	122899	110930	7791	4822	3763
NPL_14	237607	189908	143841	312958	211901	169356
NPL_15	41780	30177	22571	145781	139656	99911
CE1.2_16	176183	137163	104756	144012	132232	101015
CE1.2_17	179316	140018	99186	196664	153900	97172
CE1.2_18	41075	31276	20640	265441	221729	135190
CE3a_19	171073	127793	93053	20731	16320	12513
CE3a_21	240080	177468	124854	21850	16541	12870
CE3b_22	85266	67516	39105	9173	6582	4919
CE3b_23	190685	141000	97501	23665	18566	14754
CE3b_24	372170	273189	196224	12876	10558	8373
CE4_25	94181	72313	57054	160047	111435	92569
CE4_26	67596	50444	37301	251719	210303	179071
CE5_29	23430	19080	8098	6163	4012	2455
CE5_30	264209	200898	158657	73797	61584	55531
CE_Treated_31	160899	123151	90177	290082	215612	120794
CE_Treated_32	98217	69500	49238	17458	14593	11460
CE_Treated_33	90160	66962	42877	17015	13081	9312

## Sheet: Supp Table S4
Supplementary Table S4. Number of raw read counts corresponding to endogenous sRNAs identified in the alveolar echinococcosis set.
Gene_Symbol	Negative_1	Negative_2	Negative_3	Positive_4	Positive_5	Treated_8	Treated_9
hsa-let-7a-5p	47696	48827	171234	75964	33312	22954	25870
hsa-let-7b-5p	59340	59948	208775	93686	72224	22188	30174
hsa-let-7c-5p	1489	1593	2374	2711	2379	1055	1872
hsa-let-7d-5p	1623	1610	4910	2215	1062	505	827
hsa-let-7e-5p	1562	942	3288	1464	0	699	0
hsa-let-7f-5p	21920	22265	74737	34832	9756	10173	9938
hsa-let-7g-5p	1371	1700	7241	2926	940	696	899
hsa-let-7i-5p	13582	14775	47804	19756	10416	7267	5913
hsa-miR-101-3p	1025	1772	3651	5403	2661	225	568
hsa-miR-103a-3p	7243	5082	13891	0	3499	1405	2736
hsa-miR-106b-3p	200	339	862	83	190	0	63
hsa-miR-10a-5p	560	599	848	534	889	217	547
hsa-miR-10b-5p	481	843	683	804	824	329	509
hsa-miR-1179-5p	22	0	35	49	0	0	0
hsa-miR-122-5p	10105	4765	20999	45150	30450	8512	26250
hsa-miR-1229-3p	42	47	20	0	22	0	0
hsa-miR-125a-5p	4031	2417	7940	3692	7321	1689	3425
hsa-miR-125b-5p	879	1004	1585	1355	2011	530	1189
hsa-miR-126-3p	20719	16134	30705	33840	25710	13879	16831
hsa-miR-1270-5p	0	0	0	0	26	0	0
hsa-miR-127-3p	223	218	67	56	360	135	0
hsa-miR-128-3p	316	220	1028	0	453	228	80
hsa-miR-1294-5p	0	0	98	137	38	0	0
hsa-miR-1296-5p	25	0	0	34	0	34	0
hsa-miR-1301-3p	206	136	104	147	210	132	66
hsa-miR-130a-3p	309	37	331	435	146	68	162
hsa-miR-133a-3p	0	0	34	0	0	0	53
hsa-miR-136-3p	0	0	0	0	62	0	0
hsa-miR-139-3p	562	498	852	589	337	187	111
hsa-miR-1-3p	22	22	167	90	22	177	53
hsa-miR-140-3p	2898	1485	3967	938	1131	478	499
hsa-miR-141-3p	59	0	54	0	56	0	65
hsa-miR-142-3p	11573	9218	17846	11308	5270	6892	6191
hsa-miR-142-5p	1744	1127	3521	2086	1292	1047	1089
hsa-miR-143-3p	517	409	666	818	346	266	0
hsa-miR-144-5p	162	319	990	0	0	0	0
hsa-miR-145-5p	19	0	112	63	114	30	46
hsa-miR-146a-5p	6378	4808	13432	6504	2056	3754	1920
hsa-miR-146b-5p	358	0	327	90	116	197	36
hsa-miR-148a-3p	3684	3323	10534	6146	3236	2175	2411
hsa-miR-148b-3p	735	500	888	1380	319	464	273
hsa-miR-150-5p	10154	5860	8462	6661	15746	7324	9104
hsa-miR-151b-3p	3480	1798	5643	2889	1481	2056	1616
hsa-miR-152-3p	68	64	335	232	151	120	0
hsa-miR-155-5p	600	418	813	1206	630	463	542
hsa-miR-15a-5p	1036	414	746	758	687	131	362
hsa-miR-15b-5p	1231	563	1512	1224	0	33	431
hsa-miR-16-5p	77588	93291	335520	201052	109565	20047	38603
hsa-miR-17-5p	298	131	827	299	224	123	0
hsa-miR-181a-5p	745	545	1126	1027	922	411	122
hsa-miR-181b-5p	359	105	187	214	137	39	84
hsa-miR-181d-5p	103	38	33	0	0	0	0
hsa-miR-182-5p	398	1744	3496	2478	751	142	858
hsa-miR-183-5p	345	496	1646	900	489	144	328
hsa-miR-184-3p	0	44	0	0	50	0	0
hsa-miR-185-5p	3679	1517	6793	3330	2533	636	858
hsa-miR-186-5p	418	92	817	502	832	205	59
hsa-miR-190a-5p	167	213	1089	412	82	40	0
hsa-miR-190b-5p	0	85	50	17	0	28	0
hsa-miR-191-5p	11105	6998	21740	6603	4835	3724	5710
hsa-miR-192-5p	322	171	856	1097	587	112	699
hsa-miR-193a-5p	350	159	904	413	509	166	107
hsa-miR-193b-5p	0	0	0	0	0	27	84
hsa-miR-194-5p	74	72	166	326	241	0	64
hsa-miR-195-5p	0	46	67	98	0	34	0
hsa-miR-196b-5p	247	130	415	339	160	14	0
hsa-miR-197-3p	448	386	904	249	497	189	56
hsa-miR-1976-3p	27	0	151	0	0	0	0
hsa-miR-199a-3p	3757	2844	6186	2683	1804	1968	1013
hsa-miR-19a-3p	88	44	118	84	20	18	0
hsa-miR-19b-3p	238	306	907	0	160	225	52
hsa-miR-200a-3p	34	0	61	0	20	0	0
hsa-miR-200c-3p	141	0	219	143	36	0	57
hsa-miR-203a-3p	33	39	26	0	0	0	0
hsa-miR-204-3p	0	0	0	55	0	31	0
hsa-miR-204-5p	30	87	0	0	26	0	55
hsa-miR-205-5p	0	100	63	27	506	0	63
hsa-miR-206-3p	0	0	20	0	79	0	0
hsa-miR-20a-5p	405	460	792	161	126	87	55
hsa-miR-20b-5p	79	96	287	212	21	0	67
hsa-miR-210-3p	0	0	25	0	0	20	61
hsa-miR-214-3p	0	0	0	0	0	0	60
hsa-miR-21-5p	3820	4636	5072	5829	4378	3413	2248
hsa-miR-221-3p	1430	891	1426	1168	707	466	751
hsa-miR-222-3p	44	314	303	346	125	0	259
hsa-miR-22-3p	903	721	911	1042	772	182	611
hsa-miR-224-5p	158	229	1038	476	36	289	254
hsa-miR-24-3p	0	693	1544	0	0	503	612
hsa-miR-26a-5p	6165	4313	8427	6923	3845	2833	3662
hsa-miR-26b-5p	3836	4150	9992	6316	2747	2741	3352
hsa-miR-27a-3p	424	286	442	305	136	88	131
hsa-miR-27b-3p	327	279	726	289	502	268	355
hsa-miR-28-3p	348	120	628	494	315	0	226
hsa-miR-29a-3p	327	271	791	473	1064	142	696
hsa-miR-29b-3p	130	97	132	0	132	18	0
hsa-miR-29c-3p	0	322	857	0	992	231	142
hsa-miR-301a-3p	21	0	66	37	0	0	43
hsa-miR-3065-5p	23	0	28	0	0	36	0
hsa-miR-30a-5p	714	349	544	942	1097	352	752
hsa-miR-30b-5p	62	44	241	47	31	0	0
hsa-miR-30c-5p	79	0	629	261	146	88	242
hsa-miR-30d-5p	11961	10344	25044	9388	12820	4909	3383
hsa-miR-30e-5p	2913	1958	6335	4491	2111	1237	2089
hsa-miR-3127-5p	17	0	39	0	25	0	0
hsa-miR-3138-3p	76	231	76	101	60	0	0
hsa-miR-3155b-5p	0	31	0	45	24	0	0
hsa-miR-3173-5p	53	43	83	120	21	0	43
hsa-miR-320a-3p	47402	19585	19830	17627	24808	5930	19928
hsa-miR-320e-3p	81	102	0	0	34	0	0
hsa-miR-323a-3p	0	50	11	33	48	0	0
hsa-miR-323b-3p	118	95	0	0	0	42	0
hsa-miR-324-5p	126	245	804	263	411	0	0
hsa-miR-32-5p	168	0	144	43	107	0	70
hsa-miR-326-3p	95	0	247	31	0	123	0
hsa-miR-328-3p	1582	1056	2331	1154	852	652	421
hsa-miR-331-3p	53	0	39	0	0	0	0
hsa-miR-335-5p	1511	962	1790	908	668	320	233
hsa-miR-338-3p	31	0	37	107	14	0	0
hsa-miR-340-5p	65	0	265	117	205	0	40
hsa-miR-342-3p	4934	8241	7496	4798	9892	5714	8065
hsa-miR-345-5p	42	77	79	24	49	0	0
hsa-miR-34a-5p	25	0	37	32	39	45	86
hsa-miR-34b-3p	23	0	18	0	0	0	0
hsa-miR-361-3p	311	256	385	172	459	254	236
hsa-miR-361-5p	507	388	471	655	476	145	391
hsa-miR-363-3p	134	129	136	134	211	0	60
hsa-miR-365b-3p	0	0	0	0	36	0	0
hsa-miR-3679-5p	202	99	101	0	43	46	197
hsa-miR-370-3p	222	139	42	28	0	151	52
hsa-miR-374a-5p	119	166	113	151	34	0	0
hsa-miR-374b-5p	0	0	0	66	0	0	0
hsa-miR-375-3p	0	0	0	46	0	0	0
hsa-miR-378a-3p	0	440	377	563	424	224	207
hsa-miR-379-5p	175	67	34	112	0	98	0
hsa-miR-381-3p	0	0	0	0	0	104	0
hsa-miR-382-5p	2298	2461	609	556	1381	908	47
hsa-miR-3911-5p	16	37	0	0	0	0	0
hsa-miR-409-3p	1217	734	636	272	660	637	38
hsa-miR-421-3p	96	73	121	43	30	0	0
hsa-miR-423-5p	156237	86354	110574	114018	131944	36478	92000
hsa-miR-424-5p	10	0	176	95	0	0	0
hsa-miR-432-5p	2638	2270	626	836	1124	1815	138
hsa-miR-4433b-5p	2055	649	470	831	135	1072	412
hsa-miR-4446-3p	88	0	60	0	0	0	0
hsa-miR-451a-5p	5222	3520	9377	7497	11105	0	1302
hsa-miR-454-3p	401	128	664	274	132	32	128
hsa-miR-4669-3p	0	73	0	29	0	0	47
hsa-miR-4714-3p	33	39	29	0	0	0	0
hsa-miR-4732-5p	0	0	1544	1024	0	0	852
hsa-miR-4738-3p	51	0	0	0	32	0	0
hsa-miR-4742-3p	30	0	28	0	0	0	0
hsa-miR-483-5p	6359	4353	6808	3853	7449	4010	9155
hsa-miR-484-5p	2427	1098	1730	1702	3258	235	721
hsa-miR-485-3p	218	181	164	0	198	0	0
hsa-miR-485-5p	0	0	0	84	0	165	50
hsa-miR-486-5p	168954	141002	329213	249891	311830	14359	49744
hsa-miR-491-5p	0	40	14	0	0	0	0
hsa-miR-493-5p	69	33	0	49	0	0	0
hsa-miR-494-3p	0	0	0	0	107	30	0
hsa-miR-497-5p	28	0	57	45	0	0	0
hsa-miR-500a-3p	28	101	64	0	78	34	0
hsa-miR-5010-5p	25	41	46	0	0	0	0
hsa-miR-501-3p	643	281	219	146	306	0	18
hsa-miR-502-3p	0	82	0	47	78	0	56
hsa-miR-503-5p	27	0	77	41	98	0	0
hsa-miR-505-5p	64	0	190	39	0	0	40
hsa-miR-532-3p	159	130	347	0	271	0	16
hsa-miR-532-5p	0	0	0	110	0	0	0
hsa-miR-542-3p	0	40	26	0	0	33	0
hsa-miR-574-3p	449	438	719	291	199	120	403
hsa-miR-576-5p	24	98	37	0	56	0	0
hsa-miR-584-5p	3360	1523	3476	1696	932	835	609
hsa-miR-590-3p	26	0	34	0	0	0	0
hsa-miR-625-3p	0	257	794	471	166	437	320
hsa-miR-627-5p	0	37	26	0	58	0	0
hsa-miR-628-3p	65	43	89	115	37	0	0
hsa-miR-629-5p	1658	910	1349	2082	1175	225	1163
hsa-miR-642a-3p	19	0	27	0	0	0	0
hsa-miR-651-5p	34	0	0	47	0	0	0
hsa-miR-652-3p	32	0	337	93	83	25	0
hsa-miR-654-3p	132	154	0	52	0	25	0
hsa-miR-660-5p	2698	378	940	862	902	46	232
hsa-miR-664a-5p	653	0	616	344	151	0	110
hsa-miR-664b-5p	37	38	0	108	103	0	0
hsa-miR-671-5p	422	180	0	225	122	234	143
hsa-miR-6734-5p	0	50	0	0	28	0	0
hsa-miR-6735-5p	38	0	55	0	0	0	0
hsa-miR-744-5p	2113	524	1972	657	241	652	486
hsa-miR-7-5p	345	142	530	220	72	304	41
hsa-miR-760-3p	0	38	0	38	57	85	0
hsa-miR-769-5p	39	114	57	69	29	0	0
hsa-miR-885-5p	0	40	60	0	13	13	58
hsa-miR-92a-3p	32601	33137	57536	0	84295	8181	12807
hsa-miR-92b-3p	130	59	0	0	256	41	0
hsa-miR-93-5p	3204	3472	13020	4840	2055	1138	1118
hsa-miR-9-3p	11	42	0	0	0	0	47
hsa-miR-942-5p	0	81	81	103	26	56	0
hsa-miR-95-3p	23	0	43	0	35	0	119
hsa-miR-96-5p	0	26	64	104	166	0	0
hsa-miR-98-5p	277	179	803	391	149	135	49
hsa-miR-99a-5p	92	50	113	76	74	44	75
hsa-miR-99b-5p	0	0	1907	0	0	188	264
miR-1246-5p/URS0000A90D33_9606_Homo_sapiens_(human)_snRNA_AC024051.12	13627	6403	6681	52423	24704	4626	11998
Glu-5p	558203	323611	403593	471258	1050948	217864	553536
Gly-5p	2609536	727122	2941303	765260	621236	102546	111491
Val-5p	79220	33883	99916	150350	214595	70415	39064
scRNA-hY4_RNA	50648	33283	119596	34927	19162	10628	9934

## Sheet: Supp Table S5
Supplementary Table S5. Normalized read counts corresponding to endogenous sRNAs identified in the alveolar echinococcosis set.
	Negative_1	Negative_2	Negative_3	Positive_4	Positive_5	Treated_8	Treated_9
hsa-let-7a-5p	37196.9	50769.1	82606.6	53040.6	31344.3	44488.9	38865.2
hsa-let-7b-5p	46277.8	62332.4	100717	65414.7	67957.9	43004.2	45331.2
hsa-let-7c-5p	1161.23	1656.36	1145.26	1892.91	2238.48	2044.77	2812.36
hsa-let-7d-5p	1265.74	1674.04	2368.68	1546.59	999.27	978.778	1242.43
hsa-let-7e-5p	1218.16	979.468	1586.2	1022.21	0	1354.78	0
hsa-let-7f-5p	17094.9	23150.6	36054.6	24320.9	9179.74	19717.1	14930.1
hsa-let-7g-5p	1069.21	1767.62	3493.2	2043.03	884.476	1348.97	1350.59
hsa-let-7i-5p	10592.3	15362.7	23061.6	13794.3	9800.75	14084.7	8883.27
hsa-miR-101-3p	799.372	1842.48	1761.31	3772.55	2503.82	436.089	853.322
hsa-miR-103a-3p	5648.63	5284.14	6701.29	0	3292.32	2723.14	4110.37
hsa-miR-106b-3p	155.975	352.484	415.846	57.9533	178.777	0	94.6467
hsa-miR-10a-5p	436.73	622.825	409.092	372.856	836.489	420.584	821.773
hsa-miR-10b-5p	375.12	876.53	329.492	561.379	775.328	637.66	764.685
hsa-miR-1179-5p	17.1572	0	16.8847	34.2134	0	0	0
hsa-miR-122-5p	7880.63	4954.53	10130.3	31525.2	28651.4	16497.7	39436.1
hsa-miR-1229-3p	32.7547	48.8694	9.64839	0	20.7005	0	0
hsa-miR-125a-5p	3143.67	2513.14	3830.41	2577.88	6888.57	3273.58	5145.47
hsa-miR-125b-5p	685.51	1043.93	764.635	946.106	1892.22	1027.23	1786.27
hsa-miR-126-3p	16158.2	16775.7	14812.7	23628.2	24191.4	26899.9	25285.7
hsa-miR-1270-5p	0	0	0	0	24.4642	0	0
hsa-miR-127-3p	173.912	226.671	32.3221	39.1011	338.736	261.654	0
hsa-miR-128-3p	246.44	228.75	495.927	0	426.242	441.904	120.186
hsa-miR-1294-5p	0	0	47.2771	95.6579	35.7554	0	0
hsa-miR-1296-5p	19.4969	0	0	23.7399	0	65.898	0
hsa-miR-1301-3p	160.654	141.409	50.1716	102.64	197.596	255.839	99.1536
hsa-miR-130a-3p	240.981	38.4717	159.681	303.731	137.376	131.796	243.377
hsa-miR-133a-3p	0	0	16.4023	0	0	0	79.6234
hsa-miR-136-3p	0	0	0	0	58.3378	0	0
hsa-miR-139-3p	438.29	517.808	411.021	411.259	317.094	362.439	166.758
hsa-miR-1-3p	17.1572	22.875	80.564	62.841	20.7005	343.057	79.6234
hsa-miR-140-3p	2260.08	1544.07	1913.76	654.943	1064.19	926.448	749.662
hsa-miR-141-3p	46.0126	0	26.0506	0	52.6922	0	97.6513
hsa-miR-142-3p	9025.49	9584.64	8609.26	7895.62	4958.71	13357.9	9300.91
hsa-miR-142-5p	1360.1	1171.83	1698.6	1456.51	1215.68	2029.27	1636.04
hsa-miR-143-3p	403.195	425.268	321.291	571.155	325.563	515.555	0
hsa-miR-144-5p	126.34	331.688	477.595	0	0	0	0
hsa-miR-145-5p	14.8176	0	54.031	43.9887	107.266	58.1453	69.1071
hsa-miR-146a-5p	4974.04	4999.24	6479.86	4541.31	1934.56	7275.91	2884.47
hsa-miR-146b-5p	279.195	0	157.751	62.841	109.148	381.821	54.0838
hsa-miR-148a-3p	2873.06	3455.17	5081.81	4291.34	3044.86	4215.53	3622.11
hsa-miR-148b-3p	573.208	519.887	428.388	963.562	300.157	899.313	410.136
hsa-miR-150-5p	7918.85	6093.08	4082.23	4650.93	14815.9	14195.2	13677.2
hsa-miR-151b-3p	2713.96	1869.51	2722.29	2017.2	1393.52	3984.89	2427.76
hsa-miR-152-3p	53.0315	66.5456	161.611	161.99	142.081	232.581	0
hsa-miR-155-5p	467.925	434.626	392.207	842.069	592.787	897.375	814.262
hsa-miR-15a-5p	807.95	430.467	359.885	529.261	646.421	253.901	543.843
hsa-miR-15b-5p	960.026	585.393	729.418	854.637	0	63.9598	647.503
hsa-miR-16-5p	60508.9	97001.6	161861	140381	103093	38854.6	57994.4
hsa-miR-17-5p	232.403	136.21	398.961	208.772	210.769	238.396	0
hsa-miR-181a-5p	581.007	566.677	543.204	717.085	867.54	796.59	183.284
hsa-miR-181b-5p	279.975	109.176	90.2124	149.422	128.908	75.5888	126.196
hsa-miR-181d-5p	80.3271	39.5114	15.9198	0	0	0	0
hsa-miR-182-5p	310.39	1813.37	1686.54	1730.22	706.64	275.221	1289
hsa-miR-183-5p	269.057	515.728	794.062	628.41	460.116	279.097	492.764
hsa-miR-184-3p	0	45.7501	0	0	47.0466	0	0
hsa-miR-185-5p	2869.16	1577.34	3277.08	2325.12	2383.38	1232.68	1289
hsa-miR-186-5p	325.988	95.6593	394.137	350.513	782.856	397.326	88.6374
hsa-miR-190a-5p	130.239	221.472	525.355	287.672	77.1565	77.527	0
hsa-miR-190b-5p	0	88.3809	24.121	11.87	0	54.2689	0
hsa-miR-191-5p	8660.51	7276.34	10487.8	4610.43	4549.41	7217.76	8578.29
hsa-miR-192-5p	251.12	177.801	412.951	765.962	552.327	217.076	1050.13
hsa-miR-193a-5p	272.956	165.324	436.107	288.37	478.935	321.737	160.749
hsa-miR-193b-5p	0	0	0	0	0	52.3307	126.196
hsa-miR-194-5p	57.7107	74.8638	80.0816	227.624	226.765	0	96.149
hsa-miR-195-5p	0	47.8296	32.3221	68.4268	0	65.898	0
hsa-miR-196b-5p	192.629	135.171	200.204	236.701	150.549	27.1345	0
hsa-miR-197-3p	349.384	401.353	436.107	173.86	467.643	366.315	84.1304
hsa-miR-1976-3p	21.0566	0	72.8453	0	0	0	0
hsa-miR-199a-3p	2929.99	2957.12	2984.25	1873.36	1697.44	3814.33	1521.86
hsa-miR-19a-3p	68.629	45.7501	56.9255	58.6516	18.8186	34.8872	0
hsa-miR-19b-3p	185.61	318.171	437.554	0	150.549	436.089	78.1211
hsa-miR-200a-3p	26.5157	0	29.4276	0	18.8186	0	0
hsa-miR-200c-3p	109.962	0	105.65	99.8473	33.8736	0	85.6327
hsa-miR-203a-3p	25.7359	40.5512	12.5429	0	0	0	0
hsa-miR-204-3p	0	0	0	38.4028	0	60.0834	0
hsa-miR-204-5p	23.3962	90.4604	0	0	24.4642	0	82.628
hsa-miR-205-5p	0	103.977	30.3924	18.8523	476.112	0	94.6467
hsa-miR-206-3p	0	0	9.64839	0	74.3337	0	0
hsa-miR-20a-5p	315.849	478.296	382.076	112.416	118.557	168.621	82.628
hsa-miR-20b-5p	61.6101	99.8184	138.454	148.025	19.7596	0	100.656
hsa-miR-210-3p	0	0	12.0605	0	0	38.7635	91.642
hsa-miR-214-3p	0	0	0	0	0	0	90.1397
hsa-miR-21-5p	2979.12	4820.4	2446.83	4070	4119.4	6614.99	3377.23
hsa-miR-221-3p	1115.22	926.439	687.93	815.536	665.239	903.19	1128.25
hsa-miR-222-3p	34.3145	326.489	146.173	241.589	117.617	0	389.103
hsa-miR-22-3p	704.227	749.678	439.484	727.559	726.4	352.748	917.922
hsa-miR-224-5p	123.22	238.108	500.751	332.359	33.8736	560.133	381.591
hsa-miR-24-3p	0	720.564	744.856	0	0	974.902	919.425
hsa-miR-26a-5p	4807.93	4484.55	4065.35	4833.87	3617.88	5490.85	5501.53
hsa-miR-26b-5p	2991.6	4315.07	4820.33	4410.04	2584.74	5312.54	5035.8
hsa-miR-27a-3p	330.667	297.376	213.229	212.961	127.967	170.559	196.805
hsa-miR-27b-3p	255.019	290.097	350.237	201.789	472.348	519.431	533.326
hsa-miR-28-3p	271.396	124.773	302.959	344.927	296.394	0	339.526
hsa-miR-29a-3p	255.019	281.779	381.594	330.264	1001.15	275.221	1045.62
hsa-miR-29b-3p	101.384	100.858	63.6794	0	124.203	34.8872	0
hsa-miR-29c-3p	0	334.807	413.433	0	933.405	447.718	213.331
hsa-miR-301a-3p	16.3774	0	31.8397	25.8346	0	0	64.6001
hsa-miR-3065-5p	17.9371	0	13.5077	0	0	69.7743	0
hsa-miR-30a-5p	556.831	362.881	262.436	657.736	1032.2	682.238	1129.75
hsa-miR-30b-5p	48.3522	45.7501	116.263	32.817	29.1689	0	0
hsa-miR-30c-5p	61.6101	0	303.442	182.239	137.376	170.559	363.563
hsa-miR-30d-5p	9328.08	10755.4	12081.7	6555.01	12062.8	9514.5	5082.38
hsa-miR-30e-5p	2271.78	2035.88	3056.13	3135.76	1986.31	2397.52	3138.36
hsa-miR-3127-5p	13.2579	0	18.8144	0	23.5233	0	0
hsa-miR-3138-3p	59.2705	240.188	36.6639	70.5215	56.4559	0	0
hsa-miR-3155b-5p	0	32.233	0	31.4205	22.5824	0	0
hsa-miR-3173-5p	41.3334	44.7103	40.0408	83.788	19.7596	0	64.6001
hsa-miR-320a-3p	36967.6	20364	9566.38	12307.8	23342.7	11493.4	29938.4
hsa-miR-320e-3p	63.1699	106.057	0	0	31.9917	0	0
hsa-miR-323a-3p	0	51.9887	5.30661	23.0417	45.1648	0	0
hsa-miR-323b-3p	92.0252	98.7786	0	0	0	81.4034	0
hsa-miR-324-5p	98.2642	254.745	387.865	183.635	386.723	0	0
hsa-miR-32-5p	131.019	0	69.4684	30.024	100.68	0	105.163
hsa-miR-326-3p	74.0881	0	119.158	21.6452	0	238.396	0
hsa-miR-328-3p	1233.76	1098	1124.52	805.761	801.674	1263.69	632.48
hsa-miR-331-3p	41.3334	0	18.8144	0	0	0	0
hsa-miR-335-5p	1178.39	1000.26	863.531	633.996	628.543	620.216	350.042
hsa-miR-338-3p	24.1761	0	17.8495	74.7109	13.1731	0	0
hsa-miR-340-5p	50.6919	0	127.841	81.6933	192.891	0	60.0931
hsa-miR-342-3p	3847.9	8568.78	3616.22	3350.12	9307.7	11074.7	12116.3
hsa-miR-345-5p	32.7547	80.0627	38.1111	16.7576	46.1057	0	0
hsa-miR-34a-5p	19.4969	0	17.8495	22.3435	36.6964	87.2179	129.2
hsa-miR-34b-3p	17.9371	0	8.68355	0	0	0	0
hsa-miR-361-3p	242.541	266.182	185.731	120.096	431.888	492.297	354.549
hsa-miR-361-5p	395.396	403.433	227.22	457.343	447.884	281.035	587.41
hsa-miR-363-3p	104.503	134.131	65.609	93.5632	198.537	0	90.1397
hsa-miR-365b-3p	0	0	0	0	33.8736	0	0
hsa-miR-3679-5p	157.535	102.938	48.7244	0	40.4601	89.1561	295.959
hsa-miR-370-3p	173.132	144.529	20.2616	19.5505	0	292.664	78.1211
hsa-miR-374a-5p	92.8051	172.603	54.5134	105.433	31.9917	0	0
hsa-miR-374b-5p	0	0	0	46.0834	0	0	0
hsa-miR-375-3p	0	0	0	32.1187	0	0	0
hsa-miR-378a-3p	0	457.501	181.872	393.105	398.955	434.151	310.982
hsa-miR-379-5p	136.478	69.6649	16.4023	78.2021	0	189.941	0
hsa-miR-381-3p	0	0	0	0	0	201.57	0
hsa-miR-382-5p	1792.15	2558.89	293.793	388.218	1299.43	1759.86	70.6094
hsa-miR-3911-5p	12.478	38.4717	0	0	0	0	0
hsa-miR-409-3p	949.108	763.195	306.819	189.919	621.015	1234.62	57.0885
hsa-miR-421-3p	74.868	75.9036	58.3728	30.024	28.228	0	0
hsa-miR-423-5p	121845	89788.7	53343	79611.1	124150	70700.8	138214
hsa-miR-424-5p	7.79875	0	84.9058	66.3321	0	0	0
hsa-miR-432-5p	2057.31	2360.29	301.995	583.723	1057.61	3517.79	207.321
hsa-miR-4433b-5p	1602.64	674.814	226.737	580.232	127.026	2077.72	618.959
hsa-miR-4446-3p	68.629	0	28.9452	0	0	0	0
hsa-miR-451a-5p	4072.51	3660.01	4523.65	5234.65	10449.1	0	1956.03
hsa-miR-454-3p	312.73	133.091	320.326	191.316	124.203	62.0216	192.298
hsa-miR-4669-3p	0	75.9036	0	20.2488	0	0	70.6094
hsa-miR-4714-3p	25.7359	40.5512	13.9902	0	0	0	0
hsa-miR-4732-5p	0	0	744.856	714.991	0	0	1279.98
hsa-miR-4738-3p	39.7736	0	0	0	30.1098	0	0
hsa-miR-4742-3p	23.3962	0	13.5077	0	0	0	0
hsa-miR-483-5p	4959.22	4526.14	3284.31	2690.29	7009.01	7772.08	13753.8
hsa-miR-484-5p	1892.76	1141.67	834.586	1188.39	3065.56	455.471	1083.18
hsa-miR-485-3p	170.013	188.199	79.1168	0	186.305	0	0
hsa-miR-485-5p	0	0	0	58.6516	0	319.799	75.1164
hsa-miR-486-5p	131763	146610	158819	174482	293411	27830.3	74731.8
hsa-miR-491-5p	0	41.591	6.75387	0	0	0	0
hsa-miR-493-5p	53.8114	34.3126	0	34.2134	0	0	0
hsa-miR-494-3p	0	0	0	0	100.68	58.1453	0
hsa-miR-497-5p	21.8365	0	27.4979	31.4205	0	0	0
hsa-miR-500a-3p	21.8365	105.017	30.8748	0	73.3927	65.898	0
hsa-miR-5010-5p	19.4969	42.6308	22.1913	0	0	0	0
hsa-miR-501-3p	501.459	292.177	105.65	101.942	287.925	0	27.0419
hsa-miR-502-3p	0	85.2615	0	32.817	73.3927	0	84.1304
hsa-miR-503-5p	21.0566	0	37.1463	28.6276	92.2114	0	0
hsa-miR-505-5p	49.912	0	91.6597	27.2311	0	0	60.0931
hsa-miR-532-3p	124	135.171	167.4	0	254.993	0	24.0372
hsa-miR-532-5p	0	0	0	76.8056	0	0	0
hsa-miR-542-3p	0	41.591	12.5429	0	0	63.9598	0
hsa-miR-574-3p	350.164	455.421	346.86	203.186	187.246	232.581	605.438
hsa-miR-576-5p	18.717	101.898	17.8495	0	52.6922	0	0
hsa-miR-584-5p	2620.38	1583.58	1676.89	1184.2	876.949	1618.38	914.918
hsa-miR-590-3p	20.2767	0	16.4023	0	0	0	0
hsa-miR-625-3p	0	267.222	383.041	328.868	156.195	846.983	480.745
hsa-miR-627-5p	0	38.4717	12.5429	0	54.5741	0	0
hsa-miR-628-3p	50.6919	44.7103	42.9353	80.2968	34.8145	0	0
hsa-miR-629-5p	1293.03	946.195	650.784	1453.72	1105.6	436.089	1747.21
hsa-miR-642a-3p	14.8176	0	13.0253	0	0	0	0
hsa-miR-651-5p	26.5157	0	0	32.817	0	0	0
hsa-miR-652-3p	24.956	0	162.575	64.9357	78.0974	48.4544	0
hsa-miR-654-3p	102.943	160.125	0	36.3081	0	48.4544	0
hsa-miR-660-5p	2104.1	393.035	453.474	601.877	848.721	89.1561	348.54
hsa-miR-664a-5p	509.258	0	297.17	240.192	142.081	0	165.256
hsa-miR-664b-5p	28.8554	39.5114	0	75.4092	96.916	0	0
hsa-miR-671-5p	329.107	187.159	0	157.102	114.794	453.533	214.833
hsa-miR-6734-5p	0	51.9887	0	0	26.3461	0	0
hsa-miR-6735-5p	29.6352	0	26.5331	0	0	0	0
hsa-miR-744-5p	1647.88	544.842	951.331	458.739	226.765	1263.69	730.131
hsa-miR-7-5p	269.057	147.648	255.682	153.611	67.7471	589.205	61.5954
hsa-miR-760-3p	0	39.5114	0	26.5329	53.6331	164.745	0
hsa-miR-769-5p	30.4151	118.534	27.4979	48.1781	27.287	0	0
hsa-miR-885-5p	0	41.591	28.9452	0	12.2321	25.1963	87.135
hsa-miR-92a-3p	25424.7	34455	27756.5	0	79315.9	15856.2	19240.3
hsa-miR-92b-3p	101.384	61.3467	0	0	240.879	79.4652	0
hsa-miR-93-5p	2498.72	3610.1	6281.1	3379.45	1933.62	2205.64	1679.6
hsa-miR-9-3p	8.57862	43.6705	0	0	0	0	70.6094
hsa-miR-942-5p	0	84.2218	39.076	71.918	24.4642	108.538	0
hsa-miR-95-3p	17.9371	0	20.744	0	32.9326	0	178.777
hsa-miR-96-5p	0	27.0341	30.8748	72.6162	156.195	0	0
hsa-miR-98-5p	216.025	186.12	387.383	273.009	140.199	261.654	73.6141
hsa-miR-99a-5p	71.7485	51.9887	54.5134	53.0657	69.629	85.2797	112.675
hsa-miR-99b-5p	0	0	919.974	0	0	364.377	396.615
miR-1246-5p/URS0000A90D33_9606_Homo_sapiens_(human)_snRNA_AC024051.12	10627.4	6657.68	3223.04	36603.5	23244.8	8966	18024.9
Glu-5p	435328	336483	194701	329048	988871	422259	831593
Gly-5p	2.03511e+06	756043	1.41894e+06	534330	584541	198752	167496
Val-5p	61781.7	35230.7	48201.4	104979	201919	136477	58686.9
scRNA-hY4_RNA	39499.1	34606.8	57695.4	24387.2	18030.1	20598.9	14924.1

## Sheet: Supp Table S6
Supplementary Table S6. Number of raw read counts corresponding to endogenous sRNAs identified in the cystic echinococcosis set.
Gene_Symbol	Control_10	Control_11	Control_12	NPL_14	NPL_15	CE1.2_16	CE1.2_17	CE1.2_18	CE3a_19	CE3a_21	CE3b_22	CE3b_23	CE3b_24	CE4_25	CE4_26	CE5_29	CE5_30	Treated_31	Treated_32	Treated_33
hsa-let-7a-5p	168656	185251	165370	181706	54496	204200	118147	111095	172242	276603	199413	159365	140281	120058	113393	120163	277031	103896	185329	195231
hsa-let-7b-5p	237125	249844	462179	294949	88445	537168	189178	278363	331530	313340	250186	159639	158316	271239	192664	201117	305564	226827	209198	363874
hsa-let-7c-5p	5508	6011	5985	6851	2726	3641	3672	2954	3985	6126	3865	4799	3307	2492	3334	3337	6581	3287	4667	4304
hsa-let-7d-5p	6429	5000	7361	9935	1704	11204	7673	5057	10736	11135	5941	6430	4403	6570	5221	3771	9819	6113	6527	7754
hsa-let-7e-5p	0	5494	1525	8674	0	7737	0	1865	8328	9453	2435	0	2664	3140	3032	2109	13281	0	0	2700
hsa-let-7f-5p	72031	92649	43762	65460	25496	67435	58785	32966	73208	125370	54964	70691	58272	41467	42001	51930	110310	40769	90666	69128
hsa-let-7g-5p	6284	7286	14825	6322	2453	8530	4849	4988	7491	7391	7932	4654	3976	5438	5601	4743	6212	3913	6156	7296
hsa-let-7i-5p	59385	62680	82202	41423	19606	74522	36317	26760	53240	79442	46564	43999	36692	32146	29054	37662	55615	37300	59000	51817
hsa-miR-100-5p	249	0	0	0	0	0	0	0	0	106	0	0	0	0	97	0	103	259	0	0
hsa-miR-101-2-3p	0	0	0	0	0	0	0	5396	0	0	0	0	0	0	0	0	0	0	0	0
hsa-miR-101-3p	4378	6127	9822	6810	2262	9130	4599	0	8556	8097	9769	5192	4602	4660	3081	4519	2371	3089	5049	6220
hsa-miR-10399-3p	0	22	0	154	26	0	0	30	28	0	0	38	0	0	39	0	0	17	0	0
hsa-miR-103a-3p	14880	17173	17747	20250	5196	18804	15733	8047	21585	27062	8891	14839	11403	9961	9079	8022	22097	11178	14776	16590
hsa-miR-106a-5p	22	0	29	17	0	24	0	0	0	0	0	12	0	0	0	16	0	0	0	0
hsa-miR-106b-3p	3951	3916	6492	2526	447	8427	1068	1280	4750	1945	1480	714	927	977	1070	1161	1361	1771	1295	5605
hsa-miR-10a-5p	2719	2306	2093	2534	1043	2632	1383	718	3171	2750	1676	2432	1375	1139	2010	1568	984	1744	1831	2592
hsa-miR-10b-5p	2282	1505	2359	2377	843	1964	1406	944	2511	2021	1405	2315	1736	1085	1411	1335	809	1463	1744	1813
hsa-miR-1179-5p	0	0	0	23	0	0	0	0	48	21	12	0	0	0	24	0	38	52	44	27
hsa-miR-1185-3p	33	0	52	31	0	39	14	0	30	0	0	21	0	0	0	0	0	0	59	13
hsa-miR-122-5p	533757	534067	69465	37572	110139	41123	25844	58465	165041	270993	149153	118749	74568	78158	67906	73512	87150	280333	148827	295504
hsa-miR-1229-3p	81	97	44	15	0	80	90	0	27	51	0	77	27	0	80	56	75	0	94	26
hsa-miR-1250-5p	0	0	0	52	0	37	0	0	0	45	0	21	0	88	24	36	35	0	21	16
hsa-miR-1255a-3p	0	32	60	28	0	0	0	0	28	0	0	0	50	0	0	0	0	94	22	45
hsa-miR-125a-5p	19723	24833	27588	37205	3125	32128	9761	5136	21953	15982	8107	12902	6559	6905	8931	5875	13982	8592	8158	9684
hsa-miR-125b-5p	7641	8353	8244	4726	1664	4248	1930	1672	4848	2535	1807	2812	2204	1912	2361	2349	1437	3134	1965	3054
hsa-miR-1260b-5p	0	0	462	0	0	787	296	0	1046	556	253	0	0	0	159	203	249	398	127	478
hsa-miR-1262-3p	0	0	0	28	0	50	0	0	0	19	0	15	0	0	27	30	0	0	47	21
hsa-miR-126-3p	91139	95609	94781	127413	31036	60876	63151	28855	73568	88902	48356	75206	46911	29299	42126	46058	66958	39167	79732	67950
hsa-miR-1270-5p	0	0	67	48	0	231	27	50	304	94	28	26	89	0	72	129	0	129	61	80
hsa-miR-1271-5p	0	58	34	0	0	0	0	0	52	0	0	0	32	0	0	0	0	0	0	0
hsa-miR-1273c-3p	0	0	0	0	0	0	0	0	23	0	0	20	0	0	0	65	0	0	0	45
hsa-miR-1273h-3p	235	365	0	0	46	491	0	0	430	188	0	0	0	0	0	0	0	0	0	392
hsa-miR-127-3p	959	309	1107	1043	218	539	442	107	2086	244	557	425	221	310	290	255	214	699	889	654
hsa-miR-128-3p	3636	4046	4411	2551	646	7093	1731	1119	4097	3339	2678	1655	1689	1138	939	1637	1605	2229	1465	5689
hsa-miR-1284-5p	0	72	39	21	0	157	28	0	27	14	20	27	0	0	0	34	0	23	0	81
hsa-miR-1287-5p	0	0	88	0	0	0	0	0	0	0	0	108	0	52	0	0	29	0	43	0
hsa-miR-1294-5p	48	424	254	144	231	173	125	254	90	121	178	55	159	305	87	251	27	211	161	153
hsa-miR-129-5p	0	0	0	30	0	39	0	0	30	0	0	17	0	17	0	0	29	0	29	23
hsa-miR-1296-5p	78	226	115	60	80	167	25	22	100	44	105	63	0	26	84	0	68	104	166	110
hsa-miR-1299-5p	0	0	0	0	0	0	58	142	0	0	0	0	0	0	0	0	0	0	0	0
hsa-miR-1301-3p	666	1235	625	771	0	1200	540	0	1203	1302	327	449	545	359	173	510	777	780	913	683
hsa-miR-1304-3p	0	0	0	0	0	652	0	0	0	0	0	199	0	0	0	0	0	0	73	674
hsa-miR-130a-3p	573	376	681	443	353	549	788	197	828	797	398	478	490	530	257	477	506	414	424	466
hsa-miR-130b-3p	0	0	0	0	0	0	0	308	386	0	321	0	0	337	612	0	0	0	0	484
hsa-miR-1322-3p	95	0	156	51	0	135	0	24	0	121	0	80	61	21	37	0	0	26	34	0
hsa-miR-132-3p	120	82	124	0	25	0	73	34	0	214	0	0	0	0	0	237	30	128	159	0
hsa-miR-133a-3p	293	347	228	44	173	131	111	0	621	195	90	112	71	130	159	444	80	60	205	109
hsa-miR-1343-3p	80	60	75	13	0	98	0	0	13	47	0	0	25	0	0	27	32	22	89	76
hsa-miR-134-5p	0	273	1331	0	0	0	0	854	4912	0	1808	0	0	0	1757	0	1951	0	1960	0
hsa-miR-135a-3p	0	0	0	0	0	0	0	0	12	31	0	22	0	0	0	0	67	0	0	0
hsa-miR-136-3p	0	0	0	0	0	0	17	0	78	30	32	0	0	0	0	0	0	0	23	22
hsa-miR-136-5p	0	0	34	16	25	24	0	0	0	0	0	0	33	30	0	0	0	19	0	0
hsa-miR-138-3p	32	23	0	23	0	0	0	0	0	0	0	0	0	0	0	0	0	0	0	17
hsa-miR-139-3p	1533	2189	3614	1815	490	1700	961	637	1636	3923	1193	1594	1942	577	557	1336	1101	1444	1139	1458
hsa-miR-1-3p	69	84	127	148	142	112	101	0	733	218	103	320	29	208	97	334	413	55	179	57
hsa-miR-140-3p	9966	12607	14815	14976	3706	48455	9365	8813	27475	16673	12371	7267	6466	6458	7296	9064	7493	16765	12157	48493
hsa-miR-141-3p	729	374	205	532	76	315	49	90	275	143	187	182	242	61	63	38	0	62	211	90
hsa-miR-142-3p	40152	37889	8812	24456	11194	21201	18919	8502	23531	54411	24365	28495	25793	12489	13876	23473	31319	14034	38132	20638
hsa-miR-142-5p	13602	23775	19875	20823	4989	46262	12549	8982	30430	13741	15136	7411	6072	7949	9461	13735	5701	10812	11477	42834
hsa-miR-143-3p	7448	12240	5260	19966	1764	22409	1713	1083	13797	8242	7049	3338	2913	1949	1638	13152	749	3713	8137	17572
hsa-miR-144-3p	0	0	1431	0	281	0	0	643	0	0	0	0	0	520	0	210	0	239	0	0
hsa-miR-145-5p	1192	937	893	445	202	2242	228	80	1070	274	381	274	172	66	191	702	153	593	272	1290
hsa-miR-1468-5p	172	79	79	80	25	93	55	55	74	117	28	69	0	0	41	84	106	66	48	75
hsa-miR-146a-5p	33548	34060	33870	50891	16960	66304	31483	11328	51217	75220	36445	42021	29938	26851	23849	23903	32681	51272	22841	79905
hsa-miR-146b-5p	1462	1484	1581	1609	375	1731	626	527	1738	1536	731	987	603	506	838	879	1161	767	860	1280
hsa-miR-148a-3p	27649	35868	14382	19384	21155	62987	15961	14396	58654	57437	55633	36239	28840	13001	16007	42336	10608	34026	56543	126828
hsa-miR-148b-3p	6803	9791	6115	2281	1985	6666	2573	1226	4578	4793	4166	3625	2870	1471	1589	2391	2472	2872	3431	6713
hsa-miR-150-5p	32249	31730	64509	23449	6912	15845	10814	15614	14682	15355	11742	9589	7321	16049	36778	11125	13079	10267	9759	10495
hsa-miR-151b-3p	16925	28525	22376	16398	4675	53335	14262	4864	33715	37269	20968	15928	14328	5735	7028	16494	14009	24131	15091	45371
hsa-miR-152-3p	539	713	619	721	385	448	531	192	832	700	824	581	307	298	341	191	755	452	628	516
hsa-miR-1538-3p	0	0	0	38	0	0	0	0	0	16	24	40	33	0	0	27	0	0	12	12
hsa-miR-154-5p	28	0	99	0	0	80	32	0	79	17	20	0	0	0	11	0	24	52	36	28
hsa-miR-155-5p	2027	2336	2500	2950	999	1800	1257	876	1430	2237	1065	2029	837	879	1605	1119	2332	1468	2176	1608
hsa-miR-15a-5p	1284	982	1717	1858	329	2478	1465	1080	1726	885	1734	1056	1108	1472	1028	522	1288	1050	937	1144
hsa-miR-15b-5p	1679	2360	4270	2642	0	4863	1979	1660	3595	1851	2545	1490	2035	2098	1397	1333	1561	0	1683	2940
hsa-miR-16-5p	612700	573549	1332753	650942	245440	1599177	462890	910647	1296296	872243	1266917	509616	467127	597733	434029	537177	318203	587577	722346	1092859
hsa-miR-17-5p	1288	1548	1939	869	574	1533	597	1404	1817	1404	1347	656	643	650	697	930	1085	1046	1708	1722
hsa-miR-181a-5p	2414	1585	4220	1716	903	3057	2051	1419	3903	2116	1454	1288	812	1065	1384	669	603	1296	1670	2957
hsa-miR-181b-5p	495	598	852	705	265	904	1042	343	833	692	458	736	700	402	479	377	94	371	679	1014
hsa-miR-181c-3p	100	170	49	42	0	270	0	34	82	101	70	92	0	0	25	0	128	44	66	204
hsa-miR-181d-5p	0	38	0	29	54	0	47	0	174	0	91	53	102	0	0	144	71	28	179	127
hsa-miR-182-5p	1432	1819	3862	1806	1242	4577	1823	1959	2478	2471	2550	1968	1455	1840	3441	978	3985	1378	1651	33396
hsa-miR-183-5p	1402	1152	2704	990	662	3947	744	1728	1533	1329	2125	871	466	1101	1894	899	1334	1434	1081	19591
hsa-miR-184-3p	0	20	0	11	58	13	60	0	0	0	42	57	84	0	11	65	0	0	47	0
hsa-miR-185-5p	4958	6551	8000	8097	2597	20206	4476	13952	18769	13507	10684	7934	5618	6314	5567	8046	6637	9255	9265	13348
hsa-miR-186-5p	2523	3171	3034	2449	630	8512	864	839	4382	3240	2485	1284	1180	723	965	1991	1104	1592	2170	7243
hsa-miR-187-3p	0	28	16	0	0	0	0	0	35	22	0	0	0	0	0	0	0	44	0	35
hsa-miR-190a-5p	290	261	406	237	124	229	153	241	184	402	224	399	323	159	403	130	657	81	310	226
hsa-miR-190b-5p	59	209	167	339	125	465	95	98	210	544	215	145	100	182	115	232	69	184	291	501
hsa-miR-191-5p	49793	92250	64827	70728	11231	146746	34674	20182	107512	54090	22197	26163	21821	19412	24549	23289	38814	47720	30537	86722
hsa-miR-192-5p	5595	5117	4324	970	1309	3427	747	1299	2946	2324	1602	942	586	1061	1167	1461	750	1258	1490	3211
hsa-miR-193a-5p	2663	2173	586	4814	1866	4329	1474	1740	5982	3159	2294	1843	1642	1348	2070	2083	1247	3875	1540	5946
hsa-miR-193b-5p	0	0	31	0	0	65	0	111	188	359	157	0	143	168	0	0	180	0	0	0
hsa-miR-194-5p	2440	1746	1063	1185	494	1528	167	461	999	1204	1405	628	597	741	331	421	220	630	316	1675
hsa-miR-195-5p	175	143	155	183	42	127	81	0	116	64	148	200	129	124	88	192	140	69	47	130
hsa-miR-196a-5p	89	35	108	132	0	0	33	95	53	89	71	16	27	62	119	31	80	0	18	97
hsa-miR-196b-5p	906	926	621	441	248	1144	339	778	1011	1164	1218	652	750	540	564	418	509	650	1340	1088
hsa-miR-197-3p	6432	7470	3476	3243	1349	7803	2637	1412	6534	3579	2670	2007	2370	1335	1142	3362	1418	3047	3459	5003
hsa-miR-1976-3p	392	301	189	83	30	442	89	0	274	244	123	118	53	0	0	229	138	94	91	378
hsa-miR-199a-3p	0	0	19499	20557	10367	0	11862	4458	31601	35415	20836	22092	0	8037	7155	0	11999	15352	28995	0
hsa-miR-199b-3p	19430	24927	0	0	0	35485	0	0	0	0	0	0	12259	0	0	21658	0	0	0	32591
hsa-miR-19a-3p	243	234	403	501	144	653	189	361	489	475	465	271	102	213	252	97	181	271	219	698
hsa-miR-19b-3p	1405	1525	2035	1762	592	3434	1018	981	2269	1909	1663	911	856	623	722	0	544	1127	1133	3179
hsa-miR-200a-3p	275	96	45	137	19	145	56	0	182	77	16	26	0	0	0	127	33	17	0	56
hsa-miR-200c-3p	1266	759	526	488	0	679	185	260	547	654	318	187	170	120	176	311	396	276	370	493
hsa-miR-202-3p	22	0	0	0	0	36	10	0	57	101	0	0	0	157	0	0	0	0	74	59
hsa-miR-203a-3p	0	111	45	32	0	24	48	0	10	131	0	0	44	0	0	0	0	44	38	206
hsa-miR-204-3p	0	0	0	0	46	0	0	0	0	0	0	0	0	0	0	0	0	46	0	0
hsa-miR-204-5p	115	200	194	98	0	141	55	39	147	116	27	29	95	17	57	60	23	0	50	34
hsa-miR-205-5p	1522	703	705	146	185	624	448	44	471	260	262	292	232	285	292	404	87	249	520	797
hsa-miR-206-3p	1859	212	193	762	0	199	0	0	313	164	716	1362	713	148	194	1462	94	292	2215	160
hsa-miR-208b-3p	29	0	0	0	0	0	14	0	13	0	0	15	0	22	68	0	0	0	0	0
hsa-miR-20a-5p	1384	1537	2422	1275	658	1898	1366	1512	3045	1023	1295	944	774	984	637	1580	932	810	1811	1928
hsa-miR-20b-5p	386	442	839	318	166	773	250	425	781	496	411	70	0	649	249	223	436	370	338	330
hsa-miR-210-3p	22	46	151	64	27	136	109	29	129	23	13	23	56	87	55	85	101	85	18	141
hsa-miR-2115-3p	0	0	0	0	0	0	0	0	25	24	0	0	0	0	0	0	0	51	24	59
hsa-miR-211-5p	31	24	0	0	0	27	0	0	32	0	0	0	0	0	0	84	0	0	35	21
hsa-miR-2116-3p	65	44	0	56	0	0	64	33	51	24	0	56	25	0	0	0	25	20	0	10
hsa-miR-214-3p	45	0	36	27	0	49	37	26	146	48	21	19	0	62	118	0	19	83	67	18
hsa-miR-215-5p	211	169	124	0	0	115	0	0	23	79	49	21	0	0	39	0	0	26	0	30
hsa-miR-21-5p	19479	15342	12599	12114	9816	16339	11340	6381	17802	20742	16761	16549	11923	9594	11285	12025	9261	10828	14343	12109
hsa-miR-218-5p	27	26	0	0	0	37	28	61	0	0	0	17	0	0	0	0	0	0	0	0
hsa-miR-221-3p	9493	10017	9122	7234	3373	16369	7086	2725	12633	11047	4112	5136	4616	3826	3053	4678	7756	8973	6623	14415
hsa-miR-222-3p	908	1844	759	1024	397	1740	1234	790	1407	1491	506	1136	1028	514	504	644	942	725	1214	1760
hsa-miR-22-3p	2705	1491	3378	2305	1270	3913	2600	1627	2631	2154	2108	1329	1551	1369	1015	1027	899	1952	1440	2307
hsa-miR-224-5p	1520	6980	3361	1674	675	2964	921	292	1791	3883	622	2527	1697	99	1335	1175	2217	1343	1169	938
hsa-miR-2276-3p	0	0	0	0	0	0	26	0	15	0	0	24	13	0	0	36	0	0	0	0
hsa-miR-2277-3p	67	92	69	0	0	128	0	0	123	0	0	0	31	0	24	28	0	51	19	57
hsa-miR-2277-5p	0	0	0	0	0	0	14	28	0	0	0	28	0	0	0	0	0	0	0	0
hsa-miR-2355-3p	27	0	0	55	31	0	16	0	18	46	0	0	0	0	0	0	74	0	19	60
hsa-miR-23b-3p	2632	3339	1383	0	0	2838	0	0	2265	2329	927	0	0	0	0	0	1746	0	2091	1747
hsa-miR-24-3p	0	10846	8065	9092	0	19687	8663	3867	0	9628	6573	6005	5807	3960	4105	0	5608	0	8366	18128
hsa-miR-26a-5p	23912	27874	23058	24889	6880	21527	18771	10034	28381	23053	11558	17486	11007	10462	13248	10851	18499	13211	17545	19799
hsa-miR-26b-5p	16269	22611	21745	17963	5918	17913	12928	8032	19856	19553	10695	14217	9133	9240	10729	11492	17669	9321	15468	12966
hsa-miR-27a-3p	1345	2155	1249	1951	611	3425	1314	626	2652	2130	1959	1539	940	634	646	1336	855	1089	1179	3136
hsa-miR-27b-3p	4108	2907	3596	2190	944	3698	1340	1001	3058	4221	2369	3518	1587	815	954	1501	1697	1741	2403	4018
hsa-miR-28-3p	3814	6377	3666	3647	702	6660	2451	485	5304	3940	1719	2074	1195	1568	1870	2110	2052	3499	1542	6142
hsa-miR-296-5p	0	151	172	0	0	150	0	0	47	17	53	15	0	22	0	0	0	14	0	14
hsa-miR-29a-3p	14036	11451	10206	5561	2009	14628	2609	1915	4925	3776	4123	1975	1849	1963	3645	3887	1870	5685	2335	10533
hsa-miR-29b-3p	492	439	1333	571	195	718	345	167	390	471	408	389	287	400	580	208	240	91	181	456
hsa-miR-29c-3p	4026	4597	5568	3855	1540	11578	2023	1512	3519	3211	3454	1533	1445	2002	2041	2296	1314	3245	1844	5965
hsa-miR-301a-3p	126	103	66	45	0	132	81	46	73	172	40	0	53	68	24	109	27	21	40	69
hsa-miR-301b-3p	0	0	0	16	0	19	0	0	0	43	27	0	0	0	0	0	0	22	0	0
hsa-miR-3064-5p	35	0	0	0	0	10	11	0	29	35	0	0	0	0	23	0	0	0	0	0
hsa-miR-3065-5p	68	55	26	0	0	47	0	0	77	140	34	91	36	0	29	105	0	72	19	130
hsa-miR-3074-5p	0	33	0	20	0	129	14	34	32	0	0	0	0	0	0	48	34	46	0	59
hsa-miR-30a-5p	4815	4442	2788	3568	1475	3305	1409	857	3062	2204	1725	2938	1230	1156	1183	1789	1113	1984	1371	3807
hsa-miR-30b-5p	72	202	137	28	0	239	99	31	102	157	67	115	27	49	53	191	102	154	44	210
hsa-miR-30c-5p	1911	3209	908	1397	0	2554	622	480	1800	1444	962	753	791	409	722	856	1270	715	1194	1962
hsa-miR-30d-5p	95500	123852	95275	96108	17288	216906	47792	31627	158742	125797	85531	48288	62361	38917	40464	70934	44508	108446	67411	156177
hsa-miR-30e-5p	22585	23180	21687	26171	6728	44781	13176	11601	30732	27493	23841	13102	13484	9189	8873	18665	9428	15391	22034	41977
hsa-miR-3115-5p	0	0	0	16	0	0	0	0	0	0	0	0	0	0	0	0	0	0	27	21
hsa-miR-3120-3p	42	0	0	0	0	0	13	29	33	25	0	0	42	0	0	31	34	0	0	53
hsa-miR-3124-5p	0	19	0	46	26	0	0	0	14	0	33	87	34	0	35	0	25	0	33	0
hsa-miR-3127-5p	52	0	58	57	0	59	56	0	127	70	22	10	0	28	27	60	28	78	34	112
hsa-miR-3130-3p	0	0	0	0	0	0	0	0	15	0	0	0	0	0	0	45	0	0	0	0
hsa-miR-3138-3p	262	302	102	187	93	531	234	155	316	328	267	328	95	0	135	33	368	0	58	302
hsa-miR-3140-3p	0	0	0	32	0	25	26	21	20	42	25	0	0	0	0	0	33	0	0	0
hsa-miR-3146-3p	0	0	12	0	0	0	16	0	0	34	0	0	0	0	0	0	0	0	0	28
hsa-miR-3150a-3p	0	12	11	0	20	22	25	22	13	0	0	0	0	0	0	0	0	0	0	0
hsa-miR-3150b-3p	16	21	13	24	27	83	30	0	0	81	0	0	0	0	23	52	19	12	29	42
hsa-miR-3154-3p	0	0	0	0	0	53	40	0	166	72	24	0	0	0	0	0	0	44	34	134
hsa-miR-3155b-5p	0	0	0	58	0	19	0	0	18	0	0	0	0	0	0	0	0	0	0	27
hsa-miR-3157-3p	0	0	0	24	0	24	0	0	0	0	0	0	0	0	0	0	0	0	0	0
hsa-miR-3157-5p	0	0	0	0	28	0	0	0	0	0	0	0	0	28	0	0	0	23	0	19
hsa-miR-3158-3p	27	0	32	0	0	95	44	25	46	0	0	17	0	0	0	0	0	0	0	30
hsa-miR-31-5p	0	0	19	0	0	16	0	21	14	0	0	0	0	0	0	0	35	0	0	12
hsa-miR-3161-5p	0	0	0	11	0	59	0	25	0	0	0	0	0	0	0	0	0	46	0	0
hsa-miR-3173-5p	246	250	325	150	0	224	29	49	204	186	230	96	157	40	104	213	187	165	22	84
hsa-miR-3177-3p	0	0	16	12	61	49	25	24	49	0	23	0	0	0	0	38	28	45	60	42
hsa-miR-3190-3p	0	0	0	30	0	0	0	0	0	16	0	22	36	23	0	0	0	0	23	19
hsa-miR-3192-5p	0	61	16	22	0	26	0	26	11	31	12	0	0	14	0	0	0	0	25	33
hsa-miR-3198-3p	94	71	13	71	20	0	22	51	90	63	67	58	64	26	29	31	37	0	0	50
hsa-miR-3200-3p	85	0	38	0	0	46	14	0	82	0	0	0	0	0	0	0	0	39	0	15
hsa-miR-3202-5p	0	0	0	0	0	20	39	0	0	0	0	0	0	0	0	0	0	0	0	0
hsa-miR-320a-3p	18068	13228	13366	33519	14955	30389	33360	32018	40545	33759	16477	32651	18169	38197	33507	12273	43737	34815	22304	23505
hsa-miR-320e-3p	0	46	0	0	0	115	168	55	0	23	0	0	26	114	39	0	118	0	57	0
hsa-miR-323a-3p	0	35	97	148	0	75	237	0	0	0	0	0	0	0	166	0	0	0	61	0
hsa-miR-323b-3p	201	146	230	136	191	657	186	62	627	121	358	29	61	134	580	0	148	260	203	292
hsa-miR-324-5p	0	868	1912	1409	416	2775	656	610	1314	997	856	341	0	597	531	486	470	0	0	1280
hsa-miR-32-5p	256	151	328	296	229	537	268	246	566	398	394	350	376	322	240	227	486	114	393	350
hsa-miR-326-3p	588	416	557	239	35	871	304	15	703	635	384	158	267	24	20	217	232	350	221	508
hsa-miR-328-3p	6723	7037	6116	5774	1279	7320	4770	1647	7177	7748	4496	3017	3886	3325	3002	5131	5877	5417	3796	4290
hsa-miR-329-3p	76	35	110	64	0	33	88	0	245	14	70	0	0	0	138	0	21	17	46	68
hsa-miR-330-3p	0	114	60	77	0	0	91	0	66	149	0	10	0	94	59	69	135	0	23	0
hsa-miR-331-3p	56	58	81	19	0	92	0	0	42	137	17	35	22	42	11	0	99	63	15	0
hsa-miR-335-5p	837	1269	783	1988	1380	1652	2185	1210	3973	4568	2083	3114	2078	2784	1453	965	2430	2303	1775	2321
hsa-miR-337-5p	35	0	0	106	39	0	134	64	168	21	97	33	0	54	80	42	39	64	81	50
hsa-miR-338-3p	162	378	75	108	63	398	78	25	436	43	50	87	113	65	55	153	33	95	108	211
hsa-miR-33a-5p	36	0	101	0	33	67	29	0	31	16	63	0	0	0	0	34	0	58	0	0
hsa-miR-340-5p	0	573	236	242	63	438	0	93	459	0	300	254	198	171	96	0	205	0	387	499
hsa-miR-342-3p	40590	32642	45525	34567	10347	43281	24473	17296	31540	25788	16807	16350	12005	12668	32078	13055	18781	21720	13614	26019
hsa-miR-345-5p	1271	1267	596	1966	181	3390	551	139	1776	784	513	294	273	243	365	407	208	1398	346	2775
hsa-miR-34a-5p	184	212	156	110	25	31	0	0	95	87	69	412	83	111	65	98	55	216	161	175
hsa-miR-34b-3p	0	0	15	20	0	26	17	0	41	0	0	0	0	0	0	0	0	0	0	0
hsa-miR-34c-3p	0	0	0	0	0	0	0	0	32	90	0	0	0	0	0	0	28	19	0	0
hsa-miR-3613-5p	226	194	297	210	0	387	69	71	231	548	545	180	0	0	0	143	0	153	319	137
hsa-miR-361-3p	0	4032	3175	3788	610	6862	1564	888	3723	3277	1666	1463	1744	1220	1685	1921	1428	2759	1686	4874
hsa-miR-361-5p	3156	2697	1557	3900	1142	5449	2497	2088	7851	2430	1645	2291	1645	1913	2275	1872	2501	3297	1657	6375
hsa-miR-362-5p	48	39	71	37	0	22	0	0	13	30	0	0	30	0	0	0	0	0	25	0
hsa-miR-363-3p	378	353	1538	279	110	1008	432	363	646	404	271	147	146	359	366	204	385	287	392	329
hsa-miR-365b-3p	0	242	79	212	101	281	36	27	272	135	0	89	0	45	0	103	0	89	23	337
hsa-miR-3667-3p	0	0	0	27	28	0	0	0	16	0	0	0	0	0	0	0	0	0	57	0
hsa-miR-3679-5p	13	86	35	165	69	342	171	68	199	84	115	173	153	266	202	66	245	202	116	204
hsa-miR-3682-3p	0	0	0	28	0	11	0	39	55	39	0	0	0	35	46	0	0	0	0	0
hsa-miR-3688-3p	36	23	14	0	36	0	0	0	0	16	41	0	0	0	0	0	37	48	0	45
hsa-miR-3691-3p	0	0	0	0	40	0	0	0	0	0	0	24	0	0	0	0	0	0	0	0
hsa-miR-369-5p	150	58	157	161	74	66	196	0	267	52	57	0	87	0	21	61	28	57	165	30
hsa-miR-370-3p	495	256	1017	920	119	524	498	63	917	187	0	342	119	39	356	0	262	362	1149	893
hsa-miR-371b-5p	25	0	19	0	0	35	0	0	0	0	0	0	35	0	0	0	0	0	0	0
hsa-miR-374a-5p	255	343	747	189	58	366	181	190	189	208	92	119	68	56	36	110	70	83	202	242
hsa-miR-374b-5p	102	101	218	113	0	59	14	50	107	36	49	43	32	0	0	85	40	28	27	99
hsa-miR-376a-3p	0	0	0	130	0	39	78	0	301	48	42	16	52	0	0	0	0	136	169	115
hsa-miR-376b-3p	0	0	0	13	0	17	0	0	32	0	0	17	0	0	0	0	0	0	0	0
hsa-miR-376c-3p	53	0	58	152	0	73	32	0	245	63	61	0	0	28	0	0	0	0	0	96
hsa-miR-378a-3p	887	988	1024	1137	857	1682	907	744	2013	1157	763	1067	577	1257	1055	779	851	1423	726	2622
hsa-miR-379-5p	319	118	236	373	34	243	351	34	640	137	120	186	331	95	343	119	160	182	669	246
hsa-miR-381-3p	229	81	215	279	66	211	206	28	464	60	158	83	0	0	95	185	0	132	254	160
hsa-miR-382-5p	3378	1194	4253	4404	2122	9448	4384	992	13505	3147	5604	4483	2193	1875	3160	2369	2348	5536	6890	5761
hsa-miR-3913-5p	0	0	17	13	31	53	28	0	16	54	0	0	0	0	0	33	0	64	39	21
hsa-miR-3928-3p	0	86	58	70	0	156	0	0	82	42	0	0	69	26	0	37	0	65	25	100
hsa-miR-3939-3p	0	0	0	28	0	0	0	0	26	24	0	0	0	0	0	0	0	0	0	0
hsa-miR-3940-3p	72	27	39	0	0	25	44	57	0	0	0	24	0	23	35	0	59	29	33	14
hsa-miR-409-3p	2667	1507	4725	5943	715	7687	2851	419	10697	1691	3979	1808	1366	911	2054	2329	1046	3087	4844	3633
hsa-miR-411-5p	0	40	0	190	34	0	0	0	362	0	25	0	0	0	58	0	78	0	136	0
hsa-miR-412-5p	0	0	0	0	0	0	0	0	0	0	0	0	0	0	0	0	0	0	25	60
hsa-miR-421-3p	0	305	280	589	30	405	203	178	521	269	205	178	327	98	163	224	0	198	256	459
hsa-miR-423-5p	122290	110112	106045	163673	81440	327026	177003	183029	224820	238284	187094	137999	166284	211004	175646	118076	219451	225815	149664	263323
hsa-miR-424-5p	270	97	70	273	147	343	231	93	365	166	216	192	192	48	142	255	0	142	170	418
hsa-miR-429-3p	117	0	0	0	0	35	0	0	14	19	0	23	72	0	0	49	37	0	0	0
hsa-miR-431-5p	562	164	1040	0	0	0	917	0	3305	377	0	352	0	151	393	305	0	872	1208	0
hsa-miR-432-5p	5115	2088	7833	7506	3228	5098	7493	1856	28928	3870	10544	6921	4148	2771	5065	4810	3425	7954	13344	11462
hsa-miR-433-3p	0	0	13	55	0	0	23	18	105	0	0	0	0	0	0	0	0	31	0	73
hsa-miR-4429-5p	0	0	0	0	0	0	10	0	0	11	0	19	0	16	19	0	16	20	13	0
hsa-miR-4433a-5p	19	0	0	0	49	0	0	0	0	0	0	0	0	0	0	0	0	0	0	0
hsa-miR-4433b-5p	7177	3790	4861	0	2049	3066	2388	1172	2961	4015	1922	0	2897	985	648	1801	5262	2671	4339	0
hsa-miR-4446-3p	214	237	63	60	83	337	68	66	67	350	136	141	223	65	40	69	344	165	168	184
hsa-miR-450a-3p	28	0	16	12	0	0	0	0	0	35	0	26	0	0	0	0	0	28	0	34
hsa-miR-450b-5p	40	60	18	78	29	125	86	26	116	105	98	70	42	80	153	76	0	47	89	136
hsa-miR-451a-5p	17126	0	53871	24296	0	55464	16522	22374	33900	15908	28713	7952	9027	11337	11081	0	0	14539	0	28613
hsa-miR-452-5p	0	47	30	0	0	17	11	0	49	47	21	0	0	0	38	30	0	15	24	0
hsa-miR-454-3p	805	790	667	665	228	429	471	287	626	790	413	505	627	342	254	381	787	363	1043	519
hsa-miR-4645-3p	0	32	0	0	0	27	17	0	16	47	0	0	34	0	0	0	0	0	0	44
hsa-miR-4662a-5p	0	22	17	24	0	42	14	0	0	0	33	0	0	0	0	35	37	0	0	0
hsa-miR-4667-5p	24	0	16	0	0	0	0	0	0	0	0	24	0	52	0	0	0	42	0	14
hsa-miR-4669-3p	0	60	0	0	29	0	25	27	0	0	0	0	0	0	34	0	0	0	0	0
hsa-miR-4676-3p	46	23	19	0	0	69	0	0	24	0	0	0	0	0	0	0	18	0	0	50
hsa-miR-4685-3p	65	0	0	0	0	0	0	0	46	0	0	0	0	109	0	0	0	0	18	0
hsa-miR-4688-3p	0	24	24	0	0	0	0	0	0	0	0	0	0	0	0	45	0	20	0	0
hsa-miR-4716-3p	0	0	0	0	0	0	0	0	34	0	0	32	0	0	35	0	0	0	18	12
hsa-miR-4732-5p	1128	0	2561	0	842	0	2932	4019	2802	0	2695	0	0	0	2832	0	0	2636	1606	1617
hsa-miR-4738-3p	35	70	0	0	0	127	0	0	79	12	65	17	0	48	40	0	31	32	14	10
hsa-miR-4742-3p	0	24	76	0	0	103	0	24	39	61	21	44	32	26	0	36	56	73	26	0
hsa-miR-4753-5p	0	30	0	0	0	0	0	0	39	0	26	21	0	0	34	0	0	0	0	25
hsa-miR-4762-3p	0	0	23	0	0	23	0	0	0	0	0	0	0	0	0	36	0	0	0	0
hsa-miR-4772-3p	53	234	16	135	0	199	17	0	107	0	41	0	0	0	0	0	0	64	78	304
hsa-miR-4779-3p	0	0	0	0	0	19	0	25	0	0	0	0	0	0	0	0	0	0	0	0
hsa-miR-483-5p	4693	5607	1659	3859	7977	1648	3989	6207	4640	6188	2623	8800	3548	7476	7622	1350	9383	10660	4107	4947
hsa-miR-484-5p	3200	0	6826	4470	1212	5983	6421	4529	0	3220	2014	1471	2344	4222	2912	1173	2225	0	2292	3495
hsa-miR-485-3p	1415	508	2605	1164	555	1547	725	90	2733	308	582	362	230	270	471	407	233	376	1387	242
hsa-miR-486-5p	427078	426824	1043932	433166	142436	859200	337778	570521	690703	405069	480192	181615	285629	403798	365571	274266	267482	474483	265966	353727
hsa-miR-487b-3p	62	140	178	26	26	222	36	0	242	45	38	12	0	30	0	0	0	23	0	82
hsa-miR-491-5p	40	48	147	81	0	168	30	0	62	88	134	81	82	78	0	34	25	41	84	118
hsa-miR-493-3p	0	0	164	117	0	58	0	0	303	51	0	0	0	18	82	139	0	0	0	0
hsa-miR-493-5p	71	77	0	0	36	0	39	26	0	0	28	0	37	0	0	0	121	78	146	39
hsa-miR-494-3p	154	22	62	193	84	115	235	0	364	91	18	60	48	19	0	0	27	78	112	83
hsa-miR-495-3p	0	0	22	0	0	0	25	0	37	0	27	22	0	28	0	0	0	0	0	0
hsa-miR-497-5p	168	74	16	0	0	24	0	0	48	0	0	0	0	0	0	0	0	31	18	24
hsa-miR-499a-5p	30	43	18	0	0	26	0	0	19	0	0	27	31	0	0	0	39	0	0	14
hsa-miR-500a-3p	157	347	253	230	103	439	142	74	483	263	211	89	67	114	96	146	220	97	82	454
hsa-miR-500a-5p	0	0	25	0	0	0	0	0	24	0	0	0	0	0	0	0	0	25	20	0
hsa-miR-5010-5p	27	11	71	68	0	99	17	25	161	151	69	76	80	0	0	0	0	62	66	45
hsa-miR-501-3p	683	467	647	844	339	998	406	442	1067	817	519	300	441	495	300	458	552	752	445	758
hsa-miR-502-3p	66	69	134	0	49	191	106	222	350	142	135	110	0	43	22	108	78	112	131	338
hsa-miR-503-5p	90	67	33	93	85	272	0	65	64	116	216	60	105	21	22	0	0	110	105	138
hsa-miR-504-5p	35	0	0	70	27	138	75	0	19	0	0	12	0	0	0	76	0	0	17	142
hsa-miR-505-5p	523	523	306	263	88	699	197	199	399	384	210	257	214	194	203	188	301	306	278	493
hsa-miR-509-3p	22	0	16	0	27	0	0	14	18	61	0	0	0	0	19	0	0	0	23	0
hsa-miR-517-3p	0	0	0	65	26	0	16	0	0	0	0	0	0	0	0	0	0	0	0	0
hsa-miR-5189-5p	34	0	0	0	0	0	0	40	65	0	0	0	0	14	0	33	50	20	74	0
hsa-miR-518b-3p	41	0	18	32	0	0	0	0	0	10	21	0	0	0	0	0	0	11	0	29
hsa-miR-5193-3p	64	12	72	0	0	28	22	0	0	0	31	67	0	40	0	0	0	0	0	0
hsa-miR-5194-3p	0	23	16	0	0	0	0	0	0	0	0	22	0	0	0	0	0	0	0	0
hsa-miR-5196-3p	28	22	12	0	0	0	0	0	0	0	0	0	0	0	0	0	0	0	0	0
hsa-miR-532-3p	0	0	0	0	0	0	478	0	0	0	0	0	0	689	433	0	0	0	0	0
hsa-miR-532-5p	1958	1940	2196	981	315	1768	0	0	919	641	607	368	0	0	0	726	318	589	534	1384
hsa-miR-542-3p	32	60	0	68	0	0	130	26	0	0	0	41	259	23	0	238	99	0	138	0
hsa-miR-542-5p	0	0	79	0	0	0	0	0	110	0	0	0	0	0	27	0	0	36	0	269
hsa-miR-543-3p	47	0	0	23	34	46	0	0	19	0	0	0	0	0	0	42	0	0	34	0
hsa-miR-543-5p	0	0	0	0	0	0	18	21	0	0	0	0	0	0	0	0	0	0	0	0
hsa-miR-548a-3p	38	0	29	0	0	0	0	0	32	0	0	23	0	0	0	0	0	0	0	0
hsa-miR-548au-3p	36	22	0	0	38	0	0	0	0	0	0	0	0	0	0	0	0	0	0	0
hsa-miR-548e-3p	0	0	0	0	0	42	0	0	39	0	0	0	0	0	0	36	0	22	0	47
hsa-miR-548e-5p	0	38	39	0	0	0	23	0	0	0	0	0	0	0	0	0	0	0	0	0
hsa-miR-550a-3-3p	0	0	0	0	0	83	34	0	0	0	0	0	0	0	0	0	0	0	0	0
hsa-miR-550a-3p	0	58	43	0	74	0	0	0	39	27	0	0	59	0	0	0	0	0	24	36
hsa-miR-551a-3p	56	0	0	18	0	225	0	26	141	0	0	0	0	0	57	72	0	64	0	288
hsa-miR-5698-5p	12	13	21	0	0	0	0	0	62	77	98	11	0	0	19	18	0	0	0	10
hsa-miR-574-3p	1349	2069	1406	1508	474	2359	1004	675	3057	2442	1063	837	1022	729	460	1117	1655	927	1081	2577
hsa-miR-576-5p	526	588	619	195	58	1174	105	0	538	341	415	123	92	147	113	106	25	167	116	724
hsa-miR-582-3p	0	35	40	13	0	369	0	18	0	45	0	38	0	0	0	0	0	0	106	172
hsa-miR-584-5p	3850	5852	4326	4370	2980	10221	8165	4266	10645	12407	6239	9018	5097	3365	3980	4928	7430	10274	5860	8714
hsa-miR-589-5p	302	637	0	0	0	1500	0	0	0	0	0	127	0	116	0	0	0	0	0	1579
hsa-miR-590-3p	104	145	108	78	0	184	0	21	52	87	24	21	28	26	0	73	0	20	32	45
hsa-miR-607-3p	0	0	0	0	0	0	11	37	0	0	0	0	0	0	0	0	0	20	19	0
hsa-miR-616-3p	38	15	0	18	0	0	52	0	41	11	0	0	0	0	0	0	0	0	0	13
hsa-miR-625-3p	5864	3236	2217	3138	642	4265	2204	1234	3613	3620	4011	3460	2847	1778	1258	1762	2196	1818	2223	2279
hsa-miR-627-5p	46	23	0	25	38	15	0	30	22	56	51	19	30	36	0	0	31	36	25	38
hsa-miR-628-3p	375	642	430	536	104	1220	405	117	1066	959	645	480	223	276	200	350	540	529	563	815
hsa-miR-629-5p	1311	1637	1156	2669	799	3198	2053	1891	2644	2627	2018	1871	1423	1739	2341	1106	1899	2716	1783	3589
hsa-miR-642a-3p	0	0	0	0	111	113	90	0	210	87	161	213	81	55	379	0	146	176	0	125
hsa-miR-642a-5p	223	95	82	57	0	0	0	0	0	0	0	0	0	0	0	0	0	0	50	0
hsa-miR-643-3p	0	0	0	0	0	0	0	0	0	0	0	0	0	0	40	0	0	0	21	0
hsa-miR-6503-3p	55	39	0	0	17	0	12	0	0	0	0	0	0	25	19	0	0	34	0	0
hsa-miR-6507-5p	0	0	0	0	0	0	0	0	42	23	0	0	0	0	0	0	0	0	0	0
hsa-miR-6513-3p	0	40	0	32	0	65	0	0	37	0	0	0	0	0	0	0	21	18	0	63
hsa-miR-651-5p	27	0	20	45	28	36	0	0	16	0	0	21	0	0	28	0	0	24	28	0
hsa-miR-6516-5p	0	0	0	0	0	0	0	0	0	23	0	0	0	0	0	0	0	0	11	17
hsa-miR-652-3p	370	625	480	262	54	695	122	258	441	269	257	110	77	164	108	229	117	303	377	501
hsa-miR-654-3p	421	280	0	0	370	0	0	83	2856	225	628	0	258	32	287	0	66	0	0	1148
hsa-miR-659-5p	0	13	0	0	0	19	16	0	17	46	0	0	0	0	0	0	0	21	0	21
hsa-miR-660-5p	0	1211	1872	2400	567	4594	1862	1085	2446	1842	1789	1755	762	1584	1570	577	977	1986	1146	3320
hsa-miR-664a-5p	0	0	704	1497	527	0	1014	657	2375	2962	1637	1704	1322	741	1024	0	1231	1989	1446	2617
hsa-miR-664b-3p	69	0	86	0	0	0	0	0	0	52	57	0	0	0	0	0	34	0	0	0
hsa-miR-664b-5p	0	142	101	141	47	241	86	24	204	210	0	55	120	55	58	129	294	91	128	220
hsa-miR-665-3p	0	0	0	0	0	21	0	0	76	0	0	0	0	21	0	32	0	20	0	0
hsa-miR-668-3p	0	0	0	0	0	37	0	0	20	0	0	0	0	0	0	0	0	18	30	0
hsa-miR-671-3p	428	388	225	0	0	629	0	0	0	0	0	0	0	0	0	0	0	0	0	457
hsa-miR-671-5p	0	0	0	262	181	0	312	179	374	411	232	463	226	342	357	527	375	379	393	0
hsa-miR-6731-5p	0	0	0	22	0	0	0	0	0	0	0	0	0	0	0	0	0	12	0	26
hsa-miR-6734-5p	27	0	80	0	59	0	60	80	170	126	0	48	0	27	42	0	50	38	0	106
hsa-miR-6735-5p	34	0	0	20	0	0	0	20	74	0	0	0	98	85	18	0	36	49	0	0
hsa-miR-6747-3p	0	47	39	0	0	71	0	0	0	0	0	0	0	0	0	0	0	0	0	38
hsa-miR-6758-3p	24	0	0	18	0	0	0	0	0	0	0	0	0	0	0	0	0	18	23	0
hsa-miR-6763-5p	0	0	0	40	21	29	44	17	19	46	0	12	44	33	38	0	22	0	0	19
hsa-miR-676-3p	25	0	28	0	0	0	0	0	0	0	53	26	0	0	0	0	0	0	0	0
hsa-miR-6780b-3p	0	50	40	0	0	21	0	0	11	0	27	18	0	0	0	0	0	0	0	0
hsa-miR-6793-5p	0	46	0	22	45	36	0	11	0	0	0	16	0	0	0	84	0	25	43	0
hsa-miR-6813-5p	25	26	65	17	0	48	0	23	148	30	32	58	36	63	0	38	49	0	0	16
hsa-miR-6820-3p	0	0	0	0	0	46	0	0	0	0	14	0	28	0	0	0	0	0	0	0
hsa-miR-6894-5p	0	0	0	0	0	14	0	20	20	0	0	16	21	0	0	0	0	0	0	0
hsa-miR-7151-3p	0	0	0	36	0	0	0	0	0	40	0	21	0	27	0	28	42	26	32	42
hsa-miR-744-5p	4968	8420	4689	7884	1077	11522	4503	2065	12317	8443	2374	5542	3449	3150	2380	3643	7409	5321	5216	6857
hsa-miR-7-5p	612	548	940	321	170	808	402	439	622	706	444	195	192	463	314	608	475	266	421	488
hsa-miR-760-3p	264	386	312	409	144	531	553	544	438	778	381	757	641	601	0	282	795	579	465	707
hsa-miR-766-3p	122	0	146	0	0	0	0	0	0	73	50	0	51	35	48	72	0	0	0	136
hsa-miR-766-5p	0	0	0	0	0	125	0	64	0	0	0	47	0	0	0	0	0	0	88	0
hsa-miR-769-5p	473	250	449	416	63	1048	87	80	695	409	320	148	136	25	168	341	88	227	90	1126
hsa-miR-7848-3p	41	0	0	41	0	17	0	0	22	0	0	0	0	0	0	0	0	0	38	17
hsa-miR-7849-3p	0	0	0	0	0	20	0	0	18	0	0	16	26	0	0	0	0	15	22	13
hsa-miR-7850-5p	47	31	16	17	0	56	0	0	12	49	21	0	0	18	0	0	0	20	0	65
hsa-miR-7976-5p	25	0	77	62	0	0	21	28	35	49	0	0	0	27	0	36	71	14	0	36
hsa-miR-885-5p	0	0	0	26	0	14	20	80	187	0	0	0	130	0	0	0	49	132	0	208
hsa-miR-889-3p	0	0	0	132	0	0	19	0	169	22	51	0	0	0	36	73	30	57	70	84
hsa-miR-92a-3p	173485	130373	259414	74638	45277	168397	90120	102925	188600	120918	109447	72164	81000	86084	62504	56456	0	94750	80019	88928
hsa-miR-92b-3p	557	578	600	0	161	348	196	393	483	251	155	0	0	240	0	284	194	206	329	164
hsa-miR-935-3p	0	30	43	68	0	46	0	0	21	0	0	0	0	33	0	0	33	20	0	0
hsa-miR-93-5p	23060	32874	47264	27641	5591	71094	13280	16299	53657	25132	15348	11300	10396	10808	12374	17623	15916	21137	15544	62541
hsa-miR-939-5p	0	0	0	0	0	35	19	0	13	0	0	0	23	0	0	0	0	0	0	21
hsa-miR-9-3p	0	0	0	41	0	0	0	0	0	0	24	34	0	42	0	0	0	0	0	41
hsa-miR-942-5p	499	540	588	642	138	1898	269	360	718	306	313	121	139	463	370	454	255	410	338	1110
hsa-miR-95-3p	231	80	185	49	38	35	70	0	87	42	45	95	73	22	72	46	0	52	90	77
hsa-miR-9-5p	0	0	0	0	0	19	22	0	73	27	0	0	0	0	0	0	0	52	0	0
hsa-miR-96-5p	824	73	732	125	30	346	18	63	221	81	150	30	35	157	115	0	119	97	141	1562
hsa-miR-98-5p	1301	1359	789	1012	404	945	935	497	1454	1695	1011	1369	890	530	548	1085	1276	769	1662	928
hsa-miR-99a-5p	526	488	259	207	218	542	128	79	290	213	102	188	201	33	258	286	106	357	161	736
hsa-miR-99b-5p	2719	4365	0	0	0	0	2506	0	0	0	0	0	0	0	1555	0	0	0	1837	0
miR-1246-5p/URS0000A90D33_9606_Homo_sapiens_(human)_snRNA_AC024051.12	4849	3997	3763	169356	99911	101015	97172	135190	12513	12870	4919	14754	8373	92569	179071	2455	55531	120794	11460	9312
Glu-5p	446804	422224	630954	167045	713706	723932	207501	1101706	286525	704509	595601	193218	264495	323644	366248	150097	292363	891593	278248	87910
Gly-5p	1721299	1283684	2592350	2683217	1156215	2228060	1789732	2288060	1956425	2031434	1601266	908600	1439586	1739372	1918934	832883	1019541	2313592	697556	2190906
Val-5p	260610	232802	654348	127870	278773	346543	318031	477601	278608	202705	180929	72897	93445	207371	142198	89341	172029	865852	73863	202039
scRNA-hY4_RNA	242030	235659	110930	143841	22571	104756	99186	20640	93053	124854	39105	97501	196224	57054	37301	8098	158657	90177	49238	42877

## Sheet: Supp Table S7
Supplementary Table S7. Normalized read counts corresponding to endogenous sRNAs identified in the cystic echinococcosis set.
	Negative_10	Negative_11	Negative_12	NPL_14	NPL_15	Active_16	Active_17	Active_18	Active_19	Active_21	Active_22	Active_23	Active_24	Inactive_25	Inactive_26	Inactive_29	Inactive_30	Treated_31	Treated_32	Treated_33
hsa-let-7a-5p	135030	133378	111908	139775	115144	104831	134963	195388	103297	196939	196806	175751	192651	178510	160135	154337	331370	106279	189780	124032
hsa-let-7b-5p	189848	179884	312762	226886	186875	275768	216104	489571	198826	223095	246915	176053	217419	403296	272083	258314	365500	232030	214222	231172
hsa-let-7c-5p	4409.84	4327.84	4050.12	5270.04	5759.75	1869.19	4194.64	5195.35	2389.9	4361.65	3814.47	5292.42	4541.59	3705.27	4708.32	4286.04	7871.86	3362.39	4779.08	2734.36
hsa-let-7d-5p	5147.21	3599.93	4981.28	7642.37	3600.37	5751.84	8765.1	8893.99	6438.62	7928.01	5863.32	7091.12	6046.75	9768.7	7373.17	4843.47	11745	6253.21	6683.74	4926.17
hsa-let-7e-5p	0	3955.61	1031.99	6672.36	0	3971.97	0	3280.07	4994.49	6730.44	2403.16	0	3658.54	4668.76	4281.83	2708.8	15886.1	0	0	1715.33
hsa-let-7f-5p	57669.7	66706	29614.3	50354.3	53870.4	34619.4	67151.9	57978.9	43904.5	89262.2	54245.4	77959.3	80026.4	61655.8	59314.4	66698.8	131947	41704.1	92843.3	43917.5
hsa-let-7g-5p	5031.12	5245.82	10032.3	4863.12	5182.93	4379.08	5539.16	8772.64	4492.52	5262.32	7828.29	5132.51	5460.34	8085.57	7909.81	6091.91	7430.48	4002.75	6303.83	4635.2
hsa-let-7i-5p	47545	45128.7	55627.1	31864.1	41425.4	38257.7	41486	47064.1	31929.2	56561.9	45955.2	48522.9	50390.1	47796.8	41030.5	48373	66523.8	38155.5	60416.9	32919.7
hsa-miR-100-5p	199.355	0	0	0	0	0	0	0	0	75.471	0	0	0	0	136.985	0	123.203	264.94	0	0
hsa-miR-101-2-3p	0	0	0	0	0	0	0	9490.21	0	0	0	0	0	0	0	0	0	0	0	0
hsa-miR-101-3p	3505.13	4411.36	6646.67	5238.5	4779.37	4687.1	5253.58	0	5131.23	5764.98	9641.27	5725.83	6320.04	6928.79	4351.03	5804.2	2836.07	3159.85	5170.25	3951.61
hsa-miR-10399-3p	0	15.8397	0	118.463	54.9353	0	0	52.7625	16.7922	0	0	41.9071	0	0	55.0764	0	0	17.3899	0	0
hsa-miR-103a-3p	11913.3	12364.3	12009.6	15577.1	10978.6	9653.48	17972.3	14152.7	12945	19267.9	8774.75	16364.7	15660	14810.7	12821.5	10303.4	26431.3	11434.4	15130.8	10539.7
hsa-miR-106a-5p	17.6137	0	19.6247	13.077	0	12.321	0	0	0	0	0	13.2338	0	0	0	20.5504	0	0	0	0
hsa-miR-106b-3p	3163.26	2819.47	4393.22	1943.09	944.464	4326.2	1220.01	2251.2	2848.68	1384.82	1460.65	787.412	1273.07	1452.67	1511.07	1491.19	1627.96	1811.62	1326.1	3560.9
hsa-miR-10a-5p	2176.9	1660.29	1416.36	1949.25	2203.75	1351.2	1579.84	1262.78	1901.72	1957.97	1654.09	2682.05	1888.32	1693.54	2838.55	2013.94	1177.01	1784	1874.97	1646.72
hsa-miR-10b-5p	1827.02	1083.58	1596.36	1828.48	1781.17	1008.27	1606.12	1660.26	1505.9	1438.93	1386.63	2553.02	2384.09	1613.25	1992.63	1714.67	967.684	1496.56	1785.88	1151.81
hsa-miR-1179-5p	0	0	0	17.6925	0	0	0	0	28.7867	14.9518	11.8431	0	0	0	33.8931	0	45.4537	53.1927	45.0566	17.1533
hsa-miR-1185-3p	26.4206	0	35.189	23.8464	0	20.0216	15.9926	0	17.9917	0	0	23.1592	0	0	0	0	0	0	60.4169	8.259
hsa-miR-122-5p	427339	384521	47007.8	28901.8	232712	21111.5	29522.4	102825	98978.8	192944	147203	130959	102406	116210	95897.8	94418.7	104244	286763	152401	187736
hsa-miR-1229-3p	64.8505	69.8387	29.7753	11.5386	0	41.0699	102.81	0	16.1925	36.3115	0	84.917	37.0798	0	112.977	71.9264	89.7112	0	96.2574	16.518
hsa-miR-1250-5p	0	0	0	40.0003	0	18.9948	0	0	0	32.0396	0	23.1592	0	130.844	33.8931	46.2384	41.8652	0	21.5043	10.1649
hsa-miR-1255a-3p	0	23.0396	40.6027	21.5386	0	0	0	0	16.7922	0	0	0	68.6663	0	0	0	0	96.156	22.5283	28.5888
hsa-miR-125a-5p	15790.7	17879.4	18669.1	28619.5	6602.8	16493.7	11150.3	9032.94	13165.7	11379	8001	14228.6	9007.64	10266.8	12612.5	7545.84	16724.6	8789.07	8353.91	6152.32
hsa-miR-125b-5p	6117.57	6014.05	5578.82	3635.41	3515.86	2180.81	2204.7	2940.63	2907.46	1804.9	1783.37	3101.12	3026.81	2842.89	3334.24	3017.05	1718.87	3205.88	2012.19	1940.23
hsa-miR-1260b-5p	0	0	312.641	0	0	404.025	338.13	0	627.31	395.867	249.692	0	0	0	224.542	260.733	297.841	407.129	130.05	303.677
hsa-miR-1262-3p	0	0	0	21.5386	0	25.6687	0	0	0	13.5278	0	16.5423	0	0	38.1298	38.532	0	0	48.1287	13.3415
hsa-miR-126-3p	72968.1	68837.2	64139.5	98010.8	65575.8	31252.2	72139.3	50748.7	44120.4	63297.4	47723.8	82938.5	64424.1	43563.7	59490.9	59156.9	80091.7	40065.3	81646.7	43169.1
hsa-miR-1270-5p	0	0	45.3397	36.9234	0	118.589	30.8429	87.9375	182.316	66.9271	27.6339	28.6733	122.226	0	101.679	165.687	0	131.959	62.4649	50.8246
hsa-miR-1271-5p	0	41.7592	23.0082	0	0	0	0	0	31.1856	0	0	0	43.9464	0	0	0	0	0	0	0
hsa-miR-1273c-3p	0	0	0	0	0	0	0	0	13.7936	0	0	22.0564	0	0	0	83.4859	0	0	0	28.5888
hsa-miR-1273h-3p	188.147	262.795	0	0	97.1932	252.067	0	0	257.881	133.854	0	0	0	0	0	0	0	0	0	249.04
hsa-miR-127-3p	767.798	222.476	749.121	802.314	460.611	276.709	504.91	188.186	1251.02	173.726	549.717	468.698	303.505	460.928	409.542	327.522	255.976	715.032	910.349	415.491
hsa-miR-128-3p	2911.07	2913.06	2984.98	1962.32	1364.93	3641.36	1977.37	1968.04	2457.06	2377.34	2642.99	1825.16	2319.55	1692.05	1326.07	2102.56	1919.82	2280.12	1500.18	3614.26
hsa-miR-1284-5p	0	51.839	26.3918	16.154	0	80.5997	31.9852	0	16.1925	9.96786	19.7385	29.7761	0	0	0	43.6696	0	23.5275	0	51.4599
hsa-miR-1287-5p	0	0	59.5507	0	0	0	0	0	0	0	0	119.104	0	77.317	0	0	34.6883	0	44.0326	0
hsa-miR-1294-5p	38.4299	305.274	171.885	110.77	488.079	88.8137	142.791	446.722	53.975	86.1508	175.673	60.655	218.359	453.494	122.863	322.384	32.296	215.84	164.866	97.202
hsa-miR-129-5p	0	0	0	23.0771	0	20.0216	0	0	17.9917	0	0	18.7479	0	25.2767	0	0	34.6883	0	29.6964	14.6121
hsa-miR-1296-5p	62.4487	162.717	77.8219	46.1542	169.032	85.7335	28.5582	38.6925	59.9723	31.3276	103.627	69.4775	0	38.6585	118.626	0	81.3381	106.385	169.986	69.8838
hsa-miR-1299-5p	0	0	0	0	0	0	66.2551	249.742	0	0	0	0	0	0	0	0	0	0	0	0
hsa-miR-1301-3p	533.215	889.183	422.945	593.082	0	616.049	616.858	0	721.466	927.011	322.725	495.165	748.462	533.784	244.313	655.044	929.408	797.89	934.925	433.915
hsa-miR-1304-3p	0	0	0	0	0	334.72	0	0	0	0	0	219.461	0	0	0	0	0	0	74.7531	428.197
hsa-miR-130a-3p	458.757	270.715	460.841	340.772	745.852	281.842	900.156	346.474	496.57	567.456	392.796	527.147	672.93	788.038	362.939	612.658	605.251	423.496	434.182	296.053
hsa-miR-130b-3p	0	0	0	0	0	0	0	541.695	231.493	0	316.803	0	0	501.073	864.275	0	0	0	0	307.489
hsa-miR-1322-3p	76.0593	0	105.567	39.2311	0	69.3055	0	42.21	0	86.1508	0	88.2254	83.7729	31.2242	52.2519	0	0	26.5963	34.8165	0
hsa-miR-132-3p	96.0749	59.0389	83.9123	0	52.8224	0	83.3901	59.7975	0	152.366	0	0	0	0	0	304.403	35.8845	130.936	162.818	0
hsa-miR-133a-3p	234.583	249.835	154.29	33.8464	365.531	67.252	126.799	0	372.428	138.838	88.8233	123.516	97.5061	193.292	224.542	570.273	95.6919	61.3762	209.923	69.2485
hsa-miR-1343-3p	64.0499	43.1992	50.7534	10.0001	0	50.3106	0	0	7.7964	33.4635	0	0	34.3331	0	0	34.6788	38.2768	22.5046	91.1373	48.2834
hsa-miR-134-5p	0	196.556	900.704	0	0	0	0	1501.97	2945.84	0	1784.36	0	0	0	2481.26	0	2333.69	0	2007.07	0
hsa-miR-135a-3p	0	0	0	0	0	0	0	0	7.19667	22.0717	0	24.262	0	0	0	0	80.142	0	0	0
hsa-miR-136-3p	0	0	0	0	0	0	19.4196	0	46.7784	21.3597	31.5816	0	0	0	0	0	0	0	23.5523	13.9768
hsa-miR-136-5p	0	0	23.0082	12.3078	52.8224	12.321	0	0	0	0	0	0	45.3197	44.6059	0	0	0	19.4358	0	0
hsa-miR-138-3p	25.62	16.5597	0	17.6925	0	0	0	0	0	0	0	0	0	0	0	0	0	0	0	10.8002
hsa-miR-139-3p	1227.36	1576.05	2445.64	1396.17	1035.32	872.736	1097.78	1120.32	981.146	2793.14	1177.4	1757.89	2667	857.921	786.603	1715.96	1316.96	1477.12	1166.35	926.278
hsa-miR-1-3p	55.243	60.4789	85.9425	113.847	300.031	57.4979	115.375	0	439.597	155.214	101.653	352.902	39.8264	309.268	136.985	428.989	494.01	56.2615	183.299	36.2125
hsa-miR-140-3p	7979.02	9076.87	10025.5	11520.1	7830.39	24875.5	10697.9	15499.9	16477.4	11871	12209.3	8014.18	8879.92	9602.17	10303.5	11641.8	8962.74	17149.5	12448.9	30808
hsa-miR-141-3p	583.655	269.275	138.726	409.234	160.58	161.713	55.9742	158.287	164.924	101.815	184.555	200.713	332.345	90.6988	88.9695	48.8072	0	63.422	216.067	57.1777
hsa-miR-142-3p	32146.6	27279.6	5963.19	18812.5	23651.8	10884	21611.7	14952.9	14112.1	38740.1	24046.4	31424.8	35422.2	18569.5	19595.9	30148.7	37462.2	14355.9	39047.7	13111.5
hsa-miR-142-5p	10890.1	17117.7	13449.7	16017.8	10541.2	23749.7	14335.1	15797.1	18249.6	9783.46	14938.1	8172.98	8338.83	11819.1	13361	17641.2	6819.24	11060	11752.6	27212.8
hsa-miR-143-3p	5963.05	8812.63	3559.51	15358.6	3727.15	11504.2	1956.81	1904.73	8274.37	5868.22	6956.84	3681.21	4000.5	2897.9	2313.21	16892.4	895.916	3798.16	8332.41	11163.6
hsa-miR-144-3p	0	0	968.376	0	593.724	0	0	1130.88	0	0	0	0	0	773.17	0	269.724	0	244.482	0	0
hsa-miR-145-5p	954.344	674.627	604.304	342.311	426.805	1150.98	260.451	140.7	641.703	195.085	376.018	302.172	236.212	98.1331	269.733	901.648	183.011	606.601	278.532	819.547
hsa-miR-1468-5p	137.707	56.8789	53.4603	61.539	52.8224	47.7438	62.8281	96.7312	44.3795	83.3029	27.6339	76.0944	0	0	57.9008	107.89	126.792	67.5138	49.1527	47.6481
hsa-miR-146a-5p	26859.3	24522.7	22920.3	39147.2	35834.7	34038.7	35964	19923.1	30716	53555.9	35968.5	46341.5	41114.6	39923.8	33679.9	30701	39091.3	52448	23389.5	50764.2
hsa-miR-146b-5p	1170.51	1068.46	1069.88	1237.7	792.336	888.65	715.099	926.861	1042.32	1093.62	721.442	1088.48	828.115	752.354	1183.44	1128.99	1388.73	784.592	880.652	813.193
hsa-miR-148a-3p	22136.4	25824.5	9732.48	14910.9	44698.3	32335.9	18232.7	25319	35176.1	40894.6	54905.6	39965	39606.7	19330.7	22605.3	54376.3	12688.7	34806.4	57900.8	80574.8
hsa-miR-148b-3p	5446.64	7049.39	4138.1	1754.63	4194.1	3422.15	2939.21	2156.23	2745.53	3412.57	4111.53	3997.71	3941.44	2187.18	2244.01	3071	2956.88	2937.87	3513.39	4264.82
hsa-miR-150-5p	25819.3	22845.2	43654	18037.8	14604.3	8134.41	12353.2	27461.1	8805.13	10932.6	11588.5	10574.9	10054.1	23862.7	51938.4	14288.9	15644.4	10502.5	9993.36	6667.55
hsa-miR-151b-3p	13550.6	20537.6	15142.1	12614	9877.79	27380.8	16291.9	8554.56	20219.7	26535.2	20693.8	17565.7	19677	8527.17	9925.04	21184.9	16756.9	24684.5	15453.4	28824.5
hsa-miR-152-3p	431.536	513.35	418.885	554.62	813.465	229.992	606.577	337.68	498.969	498.393	813.226	640.737	421.611	443.086	481.565	245.32	903.092	462.367	643.081	327.819
hsa-miR-1538-3p	0	0	0	29.231	0	0	0	0	0	11.3918	23.6862	44.1127	45.3197	0	0	34.6788	0	0	12.2882	7.62369
hsa-miR-154-5p	22.4175	0	66.9945	0	0	41.0699	36.5546	0	47.3781	12.1038	19.7385	0	0	0	15.5344	0	28.7076	53.1927	36.8645	17.7886
hsa-miR-155-5p	1622.86	1681.89	1691.78	2269.25	2110.78	924.073	1435.91	1540.66	857.603	1592.72	1051.08	2237.62	1149.47	1306.95	2266.6	1437.24	2789.42	1501.67	2228.26	1021.57
hsa-miR-15a-5p	1028	707.027	1161.92	1429.24	695.143	1272.14	1673.51	1899.45	1035.12	630.111	1711.33	1164.58	1521.64	2188.66	1451.76	670.456	1540.64	1074.08	959.502	726.792
hsa-miR-15b-5p	1344.25	1699.17	2889.56	2032.32	0	2496.54	2260.67	2919.52	2156	1317.89	2511.72	1643.2	2794.72	3119.44	1972.86	1712.1	1867.19	0	1723.42	1867.8
hsa-miR-16-5p	490542	412947	901891	500729	518589	820976	528773	1.6016e+06	777418	621028	1.25035e+06	562014	641517	888748	612942	689950	380618	601054	739693	694301
hsa-miR-17-5p	1031.2	1114.54	1312.15	668.467	1212.8	787.002	681.971	2469.28	1089.7	999.634	1329.39	723.448	883.048	966.462	984.313	1194.49	1297.82	1069.99	1749.02	1094
hsa-miR-181a-5p	1932.71	1141.18	2855.73	1320.01	1907.94	1569.38	2342.92	2495.67	2340.72	1506.57	1434.99	1420.43	1115.14	1583.51	1954.5	859.263	721.278	1325.73	1710.1	1878.6
hsa-miR-181b-5p	396.309	430.552	576.559	542.312	559.917	464.09	1190.31	603.251	499.569	492.697	452.012	811.674	961.328	597.72	676.451	484.218	112.438	379.509	695.306	644.202
hsa-miR-181c-3p	80.0624	122.398	33.1589	32.308	0	138.611	0	59.7975	49.1773	71.911	69.0848	101.459	0	0	35.3054	0	153.107	45.0092	67.585	129.603
hsa-miR-181d-5p	0	27.3595	0	22.3079	114.096	0	53.6895	0	104.352	0	89.8102	58.4493	140.079	0	0	184.953	84.9266	28.6422	183.299	80.684
hsa-miR-182-5p	1146.49	1309.66	2613.46	1389.24	2624.22	2349.71	2082.47	3445.39	1486.11	1759.33	2516.66	2170.35	1998.19	2735.83	4859.43	1256.14	4766.65	1409.61	1690.65	21216.7
hsa-miR-183-5p	1122.47	829.424	1829.83	761.545	1398.74	2026.29	849.893	3039.12	919.375	946.235	2097.22	960.554	639.97	1637.04	2674.73	1154.67	1595.66	1466.89	1106.96	12446.3
hsa-miR-184-3p	0	14.3997	0	8.46161	122.548	6.67386	68.5398	0	0	0	41.4509	62.8606	115.359	0	15.5344	83.4859	0	0	48.1287	0
hsa-miR-185-5p	3969.49	4716.63	5413.7	6228.51	5487.19	10373.2	5113.07	24538.1	11256.2	9616.85	10544.3	8749.76	7715.34	9388.06	7861.8	10334.3	7938.84	9467.27	9487.49	8480.08
hsa-miR-186-5p	2019.97	2283.08	2053.15	1883.86	1331.12	4369.84	986.973	1475.59	2627.98	2306.85	2452.51	1416.02	1620.52	1075	1362.79	2557.24	1320.55	1628.51	2222.11	4601.53
hsa-miR-187-3p	0	20.1596	10.8274	0	0	0	0	0	20.9903	15.6638	0	0	0	0	0	0	0	45.0092	0	22.2358
hsa-miR-190a-5p	232.181	187.916	274.745	182.309	261.999	117.563	174.776	423.859	110.349	286.22	221.071	440.024	443.584	236.412	569.122	166.972	785.87	82.8578	317.444	143.579
hsa-miR-190b-5p	47.2368	150.477	113.011	260.771	264.112	238.719	108.521	172.357	125.942	387.323	212.189	159.909	137.333	270.609	162.405	297.981	82.5343	188.22	297.988	318.289
hsa-miR-191-5p	39865.5	66418.7	43869.2	54406.6	23729.9	75335.6	39609.1	35495.1	64477.4	38511.5	21906.8	28853	29967.3	28863	34668.4	29912.4	46427.3	48814.5	31270.3	55095.1
hsa-miR-192-5p	4479.49	3684.17	2926.1	746.16	2765.78	1759.33	853.32	2284.62	1766.78	1654.67	1581.05	1038.85	804.769	1577.56	1648.05	1876.51	897.112	1286.85	1525.78	2039.97
hsa-miR-193a-5p	2132.06	1564.53	396.553	3703.11	3942.66	2222.4	1683.79	3060.22	3587.54	2249.18	2264.01	2032.49	2255	2004.29	2923.28	2675.4	1491.6	3963.88	1576.98	3777.54
hsa-miR-193b-5p	0	0	20.9781	0	0	33.3693	0	195.221	112.748	255.604	154.947	0	196.386	249.793	0	0	215.307	0	0	0
hsa-miR-194-5p	1953.52	1257.1	719.345	911.546	1043.77	784.435	190.769	810.783	599.123	857.236	1386.63	692.57	819.875	1101.77	467.443	540.732	263.153	644.45	323.589	1064.14
hsa-miR-195-5p	140.109	102.958	104.89	140.77	88.7416	65.1985	92.5287	0	69.5678	45.5674	146.065	220.564	177.159	184.371	124.275	246.605	167.461	70.5826	48.1287	82.59
hsa-miR-196a-5p	71.2555	25.1995	73.0849	101.539	0	0	37.6969	167.081	31.7853	63.3671	70.0717	17.6451	37.0798	92.1856	168.053	39.8164	95.6919	0	18.4323	61.6248
hsa-miR-196b-5p	725.365	666.707	420.238	339.234	523.998	587.3	387.25	1368.31	606.32	828.757	1202.07	719.037	1029.99	802.907	796.489	536.879	608.84	664.908	1372.18	691.214
hsa-miR-197-3p	5149.61	5378.3	2352.25	2494.64	2850.3	4005.86	3012.32	2483.35	3918.59	2548.21	2635.09	2213.36	3254.78	1984.96	1612.75	4318.15	1696.14	3116.89	3542.07	3178.44
hsa-miR-1976-3p	313.845	216.716	127.899	63.8467	63.3869	226.911	101.667	0	164.324	173.726	121.392	130.132	72.7863	0	0	294.127	165.069	96.156	93.1853	240.146
hsa-miR-199a-3p	0	0	13195.2	15813.2	21904.4	0	13550.3	7840.5	18951.8	25215.1	20563.6	24363.4	0	11949.9	10104.4	0	14352.6	15704.1	29691.3	0
hsa-miR-199b-3p	15556.1	17947.1	0	0	0	18217.1	0	0	0	0	0	0	16835.6	0	0	27817.5	0	0	0	20705.3
hsa-miR-19a-3p	194.552	168.477	272.715	385.388	304.257	335.233	215.9	634.908	293.264	338.195	458.92	298.864	140.079	316.702	355.878	124.587	216.503	277.216	224.259	443.445
hsa-miR-19b-3p	1124.88	1097.98	1377.11	1355.4	1250.83	1762.93	1162.89	1725.33	1360.77	1359.19	1641.26	1004.67	1175.57	926.317	1019.62	0	650.705	1152.85	1160.21	2019.64
hsa-miR-200a-3p	220.172	69.1187	30.4521	105.385	40.145	74.4392	63.9705	0	109.15	54.8232	15.7908	28.6733	0	0	0	163.119	39.4729	17.3899	0	35.5772
hsa-miR-200c-3p	1013.59	546.47	355.951	375.388	0	348.581	211.331	457.275	328.048	465.642	313.842	206.227	233.465	178.424	248.55	399.448	473.675	282.33	378.885	313.207
hsa-miR-202-3p	17.6137	0	0	0	0	18.4815	11.4233	0	34.1842	71.911	0	0	0	233.438	0	0	0	0	75.7771	37.4831
hsa-miR-203a-3p	0	79.9185	30.4521	24.6156	0	12.321	54.8318	0	5.99723	93.2707	0	0	60.4263	0	0	0	0	45.0092	38.9125	130.873
hsa-miR-204-3p	0	0	0	0	97.1932	0	0	0	0	0	0	0	0	0	0	0	0	47.0551	0	0
hsa-miR-204-5p	92.0717	143.997	131.282	75.3852	0	72.3857	62.8281	68.5912	88.1592	82.5909	26.647	31.9817	130.466	25.2767	80.4962	77.0639	27.5114	0	51.2007	21.6005
hsa-miR-205-5p	1218.55	506.15	477.082	112.309	390.886	320.345	511.764	77.385	282.469	185.117	258.574	322.023	318.612	423.756	412.367	518.897	104.065	254.711	532.488	506.34
hsa-miR-206-3p	1488.36	152.637	130.606	586.159	0	102.161	0	0	187.713	116.766	706.638	1502.04	979.181	220.056	273.97	1877.79	112.438	298.697	2268.19	101.649
hsa-miR-208b-3p	23.2181	0	0	0	0	0	15.9926	0	7.7964	0	0	16.5423	0	32.711	96.0306	0	0	0	0	0
hsa-miR-20a-5p	1108.06	1106.62	1639	980.777	1390.29	974.384	1560.42	2659.23	1826.16	728.366	1278.07	1041.06	1062.95	1463.07	899.58	2029.35	1114.81	828.578	1854.49	1224.87
hsa-miR-20b-5p	309.041	318.234	567.762	244.617	350.741	396.838	285.582	747.468	468.383	353.147	405.626	77.1972	0	964.975	351.641	286.421	521.521	378.486	346.117	209.651
hsa-miR-210-3p	17.6137	33.1194	102.184	49.2312	57.0482	69.8189	124.514	51.0037	77.3642	16.3758	12.83	25.3648	76.9062	129.357	77.6718	109.174	120.811	86.9496	18.4323	89.5783
hsa-miR-2115-3p	0	0	0	0	0	0	0	0	14.9931	17.0878	0	0	0	0	0	0	0	52.1697	24.5763	37.4831
hsa-miR-211-5p	24.8193	17.2797	0	0	0	13.8611	0	0	19.1911	0	0	0	0	0	0	107.89	0	0	35.8405	13.3415
hsa-miR-2116-3p	52.0405	31.6794	0	43.0773	0	0	73.1091	58.0387	30.5859	17.0878	0	61.7578	34.3331	0	0	0	29.9037	20.4587	0	6.35307
hsa-miR-214-3p	36.0281	0	24.3616	20.7694	0	25.1553	42.2662	45.7275	87.5595	34.1755	20.7254	20.9535	0	92.1856	166.641	0	22.7268	84.9037	68.609	11.4355
hsa-miR-215-5p	168.932	121.678	83.9123	0	0	59.038	0	0	13.7936	56.2472	48.3593	23.1592	0	0	55.0764	0	0	26.5963	0	19.0592
hsa-miR-21-5p	15595.4	11046	8525.9	9318.54	20740.2	8388.02	12954	11222.6	10676.3	14768.1	16541.9	18250.5	16374.2	14265	15936.8	15444.9	11077.5	11076.4	14687.4	7692.94
hsa-miR-218-5p	21.6168	18.7196	0	0	0	18.9948	31.9852	107.284	0	0	0	18.7479	0	0	0	0	0	0	0	0
hsa-miR-221-3p	7600.32	7212.1	6172.97	5564.66	7126.8	8403.42	8094.55	4792.59	7576.3	7865.36	4058.24	5664.07	6339.27	5688.74	4311.49	6008.42	9277.33	9178.81	6782.05	9157.96
hsa-miR-222-3p	726.966	1327.65	513.625	787.699	838.82	893.271	1409.64	1389.41	843.81	1061.58	499.384	1252.8	1411.78	764.249	711.756	827.153	1126.77	741.629	1243.15	1118.14
hsa-miR-22-3p	2165.69	1073.5	2285.93	1773.09	2683.38	2008.83	2970.06	2861.48	1577.87	1533.63	2080.44	1465.64	2130.03	2035.52	1433.4	1319.08	1075.34	1996.77	1474.58	1465.65
hsa-miR-224-5p	1216.95	5025.51	2274.43	1287.7	1426.2	1521.64	1052.09	513.555	1074.1	2764.66	613.867	2786.82	2330.53	147.2	1885.31	1509.17	2651.86	1373.8	1197.07	595.918
hsa-miR-2276-3p	0	0	0	0	0	0	29.7006	0	8.99584	0	0	26.4676	17.8532	0	0	46.2384	0	0	0	0
hsa-miR-2277-3p	53.6418	66.2387	46.6932	0	0	65.7119	0	0	73.7659	0	0	0	42.5731	0	33.8931	35.9632	0	52.1697	19.4563	36.2125
hsa-miR-2277-5p	0	0	0	0	0	0	15.9926	49.245	0	0	0	30.8789	0	0	0	0	0	0	0	0
hsa-miR-2355-3p	21.6168	0	0	42.308	65.4998	0	18.2773	0	10.795	32.7515	0	0	0	0	0	0	88.515	0	19.4563	38.1184
hsa-miR-23b-3p	2107.24	2404.03	935.893	0	0	1456.96	0	0	1358.37	1658.23	914.88	0	0	0	0	0	2088.48	0	2141.21	1109.88
hsa-miR-24-3p	0	7808.97	5457.69	6993.9	0	10106.8	9896	6801.08	0	6855.04	6487.06	6622.42	7974.9	5887.98	5797.14	0	6708	0	8566.9	11516.9
hsa-miR-26a-5p	19144.5	20068.9	15603.6	19145.5	14536.7	11051.4	21442.7	17647.3	17020.7	16413.5	11406.9	19283.9	15116.2	15555.6	18709	13937	22127.6	13514	17966.3	12578.5
hsa-miR-26b-5p	13025.3	16279.6	14715.1	13817.8	12504.1	9196.07	14768	14126.3	11908.1	13921.5	10555.2	15678.8	12542.6	13738.6	15151.6	14760.3	21134.8	9534.79	15839.5	8237.4
hsa-miR-27a-3p	1076.84	1551.57	845.214	1500.78	1290.98	1758.31	1501.02	1100.98	1590.46	1516.54	1933.39	1697.24	1290.93	942.672	912.29	1715.96	1022.71	1113.98	1207.31	1992.32
hsa-miR-27b-3p	3288.96	2093	2433.46	1684.63	1994.57	1898.46	1530.72	1760.51	1833.95	3005.31	2338.03	3879.71	2179.47	1211.79	1347.25	1927.88	2029.86	1780.93	2460.71	2552.66
hsa-miR-28-3p	3053.58	4591.35	2480.83	2805.41	1483.25	3419.07	2799.85	852.993	3180.93	2805.24	1696.52	2287.24	1641.12	2331.4	2640.84	2710.08	2454.5	3579.25	1579.03	3902.06
hsa-miR-296-5p	0	108.718	116.395	0	0	77.0061	0	0	28.187	12.1038	52.307	16.5423	0	32.711	0	0	0	14.3211	0	8.8943
hsa-miR-29a-3p	11237.6	8244.56	6906.53	4277.73	4244.81	7509.63	2980.34	3368	2953.63	2688.47	4069.09	2178.06	2539.28	2918.72	5147.52	4992.46	2236.8	5815.39	2391.07	6691.69
hsa-miR-29b-3p	393.907	316.074	902.058	439.234	412.015	368.603	394.104	293.711	233.892	335.347	402.665	428.996	394.144	594.746	819.084	267.155	287.076	93.0872	185.347	289.7
hsa-miR-29c-3p	3223.31	3309.78	3767.93	2965.41	3253.86	5943.84	2310.93	2659.23	2110.42	2286.2	3408.84	1690.62	1984.46	2976.7	2882.33	2948.98	1571.74	3319.43	1888.28	3789.61
hsa-miR-301a-3p	100.879	74.1586	44.663	34.6157	0	67.7654	92.5287	80.9025	43.7798	122.462	39.477	0	72.7863	101.107	33.8931	140	32.296	21.4817	40.9606	43.8362
hsa-miR-301b-3p	0	0	0	12.3078	0	9.75411	0	0	0	30.6156	26.647	0	0	0	0	0	0	22.5046	0	0
hsa-miR-3064-5p	28.0218	0	0	0	0	5.13374	12.5656	0	17.392	24.9197	0	0	0	0	32.4809	0	0	0	0	0
hsa-miR-3065-5p	54.4424	39.5993	17.5945	0	0	24.1286	0	0	46.1786	99.6786	33.5555	100.356	49.4397	0	40.9542	134.862	0	73.6514	19.4563	82.59
hsa-miR-3074-5p	0	23.7596	0	15.3847	0	66.2252	15.9926	59.7975	19.1911	0	0	0	0	0	0	61.6512	40.6691	47.0551	0	37.4831
hsa-miR-30a-5p	3855	3198.18	1886.67	2744.64	3116.52	1696.7	1609.54	1507.25	1836.35	1569.23	1702.45	3240.08	1689.19	1718.82	1670.65	2297.79	1331.31	2029.51	1403.92	2418.62
hsa-miR-30b-5p	57.6449	145.437	92.7096	21.5386	0	122.696	113.091	54.5212	61.1717	111.782	66.124	126.824	37.0798	72.8564	74.8474	245.32	122.007	157.532	45.0566	133.415
hsa-miR-30c-5p	1529.99	2310.44	614.455	1074.62	0	1311.16	710.529	844.2	1079.5	1028.11	949.422	830.422	1086.3	608.128	1019.62	1099.45	1519.11	731.399	1222.67	1246.47
hsa-miR-30d-5p	76459.6	89171.8	64473.8	73929.8	36527.7	111354	54594.2	55624	95201.2	89566.2	84412.7	53252.9	85642	57864.3	57143.8	91107.6	53238.2	110933	69029.8	99220.4
hsa-miR-30e-5p	18082.1	16689.3	14675.9	20131.7	14215.6	22989.4	15051.3	20403.2	18430.7	19574.7	23529.3	14449.1	18517.9	13662.8	12530.6	23973.3	11277.3	15744	22563.1	26668.3
hsa-miR-3115-5p	0	0	0	12.3078	0	0	0	0	0	0	0	0	0	0	0	0	0	0	27.6484	13.3415
hsa-miR-3120-3p	33.6262	0	0	0	0	0	14.8503	51.0037	19.7908	17.7998	0	0	57.6797	0	0	39.8164	40.6691	0	0	33.6713
hsa-miR-3124-5p	0	13.6797	0	35.3849	54.9353	0	0	0	8.39612	0	32.5685	95.9451	46.6931	0	49.4275	0	29.9037	0	33.7925	0
hsa-miR-3127-5p	41.6324	0	39.2493	43.8465	0	30.2891	63.9705	0	76.1648	49.8393	21.7124	11.0282	0	41.6322	38.1298	77.0639	33.4922	79.789	34.8165	71.1544
hsa-miR-3130-3p	0	0	0	0	0	0	0	0	8.99584	0	0	0	0	0	0	57.798	0	0	0	0
hsa-miR-3138-3p	209.763	217.436	69.0247	143.847	196.499	272.602	267.305	272.606	189.512	233.533	263.509	361.724	130.466	0	190.649	42.3852	440.183	0	59.3928	191.863
hsa-miR-3140-3p	0	0	0	24.6156	0	12.8343	29.7006	36.9337	11.9945	29.9036	24.6731	0	0	0	0	0	39.4729	0	0	0
hsa-miR-3146-3p	0	0	8.12055	0	0	0	18.2773	0	0	24.2077	0	0	0	0	0	0	0	0	0	17.7886
hsa-miR-3150a-3p	0	8.63984	7.44384	0	42.2579	11.2942	28.5582	38.6925	7.7964	0	0	0	0	0	0	0	0	0	0	0
hsa-miR-3150b-3p	12.81	15.1197	8.79726	18.4617	57.0482	42.61	34.2699	0	0	57.6712	0	0	0	0	32.4809	66.7888	22.7268	12.2752	29.6964	26.6829
hsa-miR-3154-3p	0	0	0	0	0	27.2088	45.6932	0	99.554	51.2633	23.6862	0	0	0	0	0	0	45.0092	34.8165	85.1312
hsa-miR-3155b-5p	0	0	0	44.6158	0	9.75411	0	0	10.795	0	0	0	0	0	0	0	0	0	0	17.1533
hsa-miR-3157-3p	0	0	0	18.4617	0	12.321	0	0	0	0	0	0	0	0	0	0	0	0	0	0
hsa-miR-3157-5p	0	0	0	0	59.1611	0	0	0	0	0	0	0	0	41.6322	0	0	0	23.5275	0	12.0708
hsa-miR-3158-3p	21.6168	0	21.6548	0	0	48.7705	50.2625	43.9687	27.5872	0	0	18.7479	0	0	0	0	0	0	0	19.0592
hsa-miR-31-5p	0	0	12.8575	0	0	8.21398	0	36.9337	8.39612	0	0	0	0	0	0	0	41.8652	0	0	7.62369
hsa-miR-3161-5p	0	0	0	8.46161	0	30.2891	0	43.9687	0	0	0	0	0	0	0	0	0	47.0551	0	0
hsa-miR-3173-5p	196.953	179.997	219.932	115.386	0	114.996	33.1276	86.1787	122.343	132.43	226.993	105.871	215.612	59.4746	146.87	273.577	223.68	168.784	22.5283	53.3658
hsa-miR-3177-3p	0	0	10.8274	9.23085	128.887	25.1553	28.5582	42.21	29.3864	0	22.6993	0	0	0	0	48.8072	33.4922	46.0321	61.4409	26.6829
hsa-miR-3190-3p	0	0	0	23.0771	0	0	0	0	0	11.3918	0	24.262	49.4397	34.1979	0	0	0	0	23.5523	12.0708
hsa-miR-3192-5p	0	43.9192	10.8274	16.9232	0	13.3477	0	45.7275	6.59695	22.0717	11.8431	0	0	20.8161	0	0	0	0	25.6004	20.9651
hsa-miR-3198-3p	75.2586	51.119	8.79726	54.6158	42.2579	0	25.1313	89.6962	53.975	44.8554	66.124	63.9634	87.8928	38.6585	40.9542	39.8164	44.2575	0	0	31.7654
hsa-miR-3200-3p	68.053	0	25.7151	0	0	23.6152	15.9926	0	49.1773	0	0	0	0	0	0	0	0	39.8945	0	9.52961
hsa-miR-3202-5p	0	0	0	0	0	10.2675	44.5509	0	0	0	0	0	0	0	0	0	0	0	0	0
hsa-miR-320a-3p	14465.7	9523.98	9044.94	25784.1	31598.4	15600.9	38108.1	56311.6	24315.8	24036.1	16261.6	36008.1	24952	56793.8	47319.1	15763.4	52316	35613.5	22839.6	14932.9
hsa-miR-320e-3p	0	33.1194	0	0	0	59.038	191.911	96.7312	0	16.3758	0	0	35.7065	169.503	55.0764	0	141.146	0	58.3688	0
hsa-miR-323a-3p	0	25.1995	65.6411	113.847	0	38.503	270.732	0	0	0	0	0	0	0	234.428	0	0	0	62.4649	0
hsa-miR-323b-3p	160.925	105.118	155.644	104.616	403.563	337.287	212.473	109.042	376.026	86.1508	353.319	31.9817	83.7729	199.24	819.084	0	177.03	265.963	207.875	185.51
hsa-miR-324-5p	0	624.948	1293.87	1083.86	878.965	1424.61	749.368	1072.84	788.036	709.854	844.808	376.061	0	887.658	749.886	624.218	562.19	0	0	813.193
hsa-miR-32-5p	204.96	108.718	221.962	227.694	483.853	275.682	306.144	432.652	339.443	283.372	388.849	385.986	516.37	478.77	338.931	291.559	581.328	116.615	402.438	222.358
hsa-miR-326-3p	470.767	299.514	376.929	183.848	73.9513	447.149	347.268	26.3812	421.605	452.114	378.979	174.245	366.678	35.6848	28.2443	278.715	277.507	358.028	226.307	322.736
hsa-miR-328-3p	5382.59	5066.54	4138.77	4441.58	2702.39	3757.9	5448.91	2896.66	4304.21	5516.5	4437.22	3327.2	5336.74	4943.83	4239.47	6590.25	7029.77	5541.24	3887.16	2725.47
hsa-miR-329-3p	60.8474	25.1995	74.4384	49.2312	0	16.9413	100.525	0	146.932	9.96786	69.0848	0	0	0	194.886	0	25.1191	17.3899	47.1047	43.2009
hsa-miR-330-3p	0	82.0784	40.6027	59.2313	0	0	103.952	0	39.5817	106.087	0	11.0282	0	139.765	83.3206	88.6235	161.48	0	23.5523	0
hsa-miR-331-3p	44.8349	41.7592	54.8137	14.6155	0	47.2304	0	0	25.1884	97.5427	16.7777	38.5986	30.2132	62.4483	15.5344	0	118.419	64.445	15.3602	0
hsa-miR-335-5p	670.122	913.663	529.866	1529.24	2915.8	848.094	2495.99	2128.09	2382.7	3252.37	2055.77	3434.17	2853.77	4139.43	2051.95	1239.45	2906.64	2355.82	1817.63	1474.55
hsa-miR-337-5p	28.0218	0	0	81.5391	82.4029	0	153.072	112.56	100.753	14.9518	95.7317	36.393	0	80.2907	112.977	53.9448	46.6498	65.4679	82.9452	31.7654
hsa-miR-338-3p	129.701	272.155	50.7534	83.0776	133.112	204.323	89.1017	43.9687	261.479	30.6156	49.3463	95.9451	155.186	96.6462	77.6718	196.513	39.4729	97.1789	110.594	134.05
hsa-miR-33a-5p	28.8225	0	68.348	0	69.7256	34.3961	33.1276	0	18.5914	11.3918	62.1763	0	0	0	0	43.6696	0	59.3303	0	0
hsa-miR-340-5p	0	412.552	159.704	186.155	133.112	224.858	0	163.564	275.273	0	296.078	280.116	271.918	254.254	135.573	0	245.211	0	396.294	317.018
hsa-miR-342-3p	32497.3	23501.8	30807.3	26590.2	21862.1	22219.3	27956.2	30419.3	18915.3	18360.8	16587.3	18031.1	16486.8	18835.6	45301	16767.8	22464.9	22218.2	13940.9	16530.1
hsa-miR-345-5p	1017.59	912.223	403.321	1512.32	382.434	1740.34	629.424	244.466	1065.11	558.2	506.293	324.228	374.918	361.308	515.458	522.75	248.799	1430.06	354.309	1762.98
hsa-miR-34a-5p	147.315	152.637	105.567	84.6161	52.8224	15.9146	0	0	56.9737	61.9431	68.0978	454.361	113.986	165.042	91.7939	125.871	65.7882	220.954	164.866	111.179
hsa-miR-34b-3p	0	0	10.1507	15.3847	0	13.3477	19.4196	0	24.5886	0	0	0	0	0	0	0	0	0	0	0
hsa-miR-34c-3p	0	0	0	0	0	0	0	0	19.1911	64.0791	0	0	0	0	0	0	33.4922	19.4358	0	0
hsa-miR-3613-5p	180.941	139.677	200.984	161.54	0	198.676	78.8208	124.871	138.536	390.171	537.874	198.507	0	0	0	183.669	0	156.509	326.661	87.0371
hsa-miR-361-3p	0	2902.99	2148.56	2913.87	1288.87	3522.77	1786.6	1561.77	2232.77	2333.19	1644.22	1613.42	2395.08	1813.98	2379.58	2467.33	1708.1	2822.28	1726.49	3096.49
hsa-miR-361-5p	2526.77	1941.8	1053.64	3000.02	2412.93	2797.37	2852.4	3672.27	4708.42	1730.14	1623.49	2526.56	2259.12	2844.37	3212.79	2404.4	2991.57	3372.62	1696.79	4050.08
hsa-miR-362-5p	38.4299	28.0795	48.0466	28.4618	0	11.2942	0	0	7.7964	21.3597	0	0	41.1998	0	0	0	0	0	25.6004	0
hsa-miR-363-3p	302.636	254.155	1040.78	214.617	232.419	517.481	493.487	638.426	387.421	287.644	267.457	162.114	200.506	533.784	516.87	262.017	460.517	293.583	401.414	209.016
hsa-miR-365b-3p	0	174.237	53.4603	163.078	213.402	144.258	41.1239	47.4862	163.125	96.1187	0	98.1508	0	66.9089	0	132.293	0	91.0413	23.5523	214.099
hsa-miR-3667-3p	0	0	0	20.7694	59.1611	0	0	0	9.59556	0	0	0	0	0	0	0	0	0	58.3688	0
hsa-miR-3679-5p	10.4081	61.9188	23.6849	126.924	145.79	175.574	195.338	119.595	119.345	59.8072	113.496	190.787	210.119	395.506	285.267	84.7703	293.056	206.633	118.786	129.603
hsa-miR-3682-3p	0	0	0	21.5386	0	5.64711	0	68.5912	32.9847	27.7676	0	0	0	52.0403	64.9619	0	0	0	0	0
hsa-miR-3688-3p	28.8225	16.5597	9.47397	0	76.0642	0	0	0	0	11.3918	40.4639	0	0	0	0	0	44.2575	49.1009	0	28.5888
hsa-miR-3691-3p	0	0	0	0	84.5158	0	0	0	0	0	0	26.4676	0	0	0	0	0	0	0	0
hsa-miR-369-5p	120.094	41.7592	106.244	123.847	156.354	33.8827	223.897	0	160.126	37.0235	56.2547	0	119.479	0	29.6565	78.3483	33.4922	58.3074	168.962	19.0592
hsa-miR-370-3p	396.309	184.317	688.217	707.698	251.435	269.008	568.88	110.801	549.946	133.142	0	377.164	163.426	57.9877	502.748	0	313.391	370.303	1176.59	567.329
hsa-miR-371b-5p	20.0156	0	12.8575	0	0	17.9681	0	0	0	0	0	0	48.0664	0	0	0	0	0	0	0
hsa-miR-374a-5p	204.159	246.955	505.504	145.386	122.548	187.895	206.762	334.162	113.348	148.094	90.7971	131.235	93.3861	83.2644	50.8397	141.284	83.7304	84.9037	206.851	153.744
hsa-miR-374b-5p	81.6636	72.7186	147.523	86.9238	0	30.2891	15.9926	87.9375	64.1703	25.6316	48.3593	47.4212	43.9464	0	0	109.174	47.846	28.6422	27.6484	62.8954
hsa-miR-376a-3p	0	0	0	100.001	0	20.0216	89.1017	0	180.517	34.1755	41.4509	17.6451	71.4129	0	0	0	0	139.119	173.058	73.0603
hsa-miR-376b-3p	0	0	0	10.0001	0	8.72736	0	0	19.1911	0	0	18.7479	0	0	0	0	0	0	0	0
hsa-miR-376c-3p	42.4331	0	39.2493	116.924	0	37.4763	36.5546	0	146.932	44.8554	60.2024	0	0	41.6322	0	0	0	0	0	60.9895
hsa-miR-378a-3p	710.153	711.347	692.954	874.623	1810.75	863.495	1036.09	1308.51	1207.24	823.773	753.024	1176.71	792.409	1868.99	1489.89	1000.55	1017.92	1455.64	743.434	1665.78
hsa-miR-379-5p	255.399	84.9584	159.704	286.925	71.8384	124.75	400.958	59.7975	383.823	97.5427	118.431	205.124	454.571	141.252	484.389	152.843	191.384	186.174	685.066	156.286
hsa-miR-381-3p	183.343	58.3189	145.493	214.617	139.451	108.322	235.32	49.245	278.271	42.7194	155.934	91.5339	0	0	134.16	237.614	0	135.028	260.1	101.649
hsa-miR-382-5p	2704.51	859.664	2878.06	3387.72	4483.56	4850.36	5007.97	1744.68	8099.26	2240.63	5530.73	4943.93	3011.7	2787.87	4462.6	3042.74	2808.56	5662.97	7055.46	3660.01
hsa-miR-3913-5p	0	0	11.5041	10.0001	65.4998	27.2088	31.9852	0	9.59556	38.4475	0	0	0	0	0	42.3852	0	65.4679	39.9366	13.3415
hsa-miR-3928-3p	0	61.9188	39.2493	53.8466	0	80.0863	0	0	49.1773	29.9036	0	0	94.7595	38.6585	0	47.5228	0	66.4908	25.6004	63.5307
hsa-miR-3939-3p	0	0	0	21.5386	0	0	0	0	15.5928	17.0878	0	0	0	0	0	0	0	0	0	0
hsa-miR-3940-3p	57.6449	19.4396	26.3918	0	0	12.8343	50.2625	100.249	0	0	0	26.4676	0	34.1979	49.4275	0	70.5728	29.6651	33.7925	8.8943
hsa-miR-409-3p	2135.26	1085.02	3197.47	4571.58	1510.72	3946.31	3256.78	736.916	6415.23	1203.98	3926.98	1993.89	1875.96	1354.53	2900.69	2991.37	1251.17	3157.8	4960.33	2308.07
hsa-miR-411-5p	0	28.7995	0	146.155	71.8384	0	0	0	217.1	0	24.6731	0	0	0	81.9084	0	93.2996	0	139.266	0
hsa-miR-412-5p	0	0	0	0	0	0	0	0	0	0	0	0	0	0	0	0	0	0	25.6004	38.1184
hsa-miR-421-3p	0	219.596	189.479	453.081	63.3869	207.916	231.893	313.057	312.456	191.525	202.32	196.302	449.077	145.713	230.191	287.705	0	202.541	262.148	291.606
hsa-miR-423-5p	97908.3	79279.1	71762	125903	172074	167887	202196	321902	134830	169656	184648	152188	228362	313734	248050	151657	262496	230994	153258	167291
hsa-miR-424-5p	216.168	69.8387	47.3699	210.002	310.596	176.087	263.878	163.564	218.899	118.19	213.176	211.741	263.679	71.3695	200.534	327.522	0	145.257	174.082	265.558
hsa-miR-429-3p	93.673	0	0	0	0	17.9681	0	0	8.39612	13.5278	0	25.3648	98.8794	0	0	62.9356	44.2575	0	0	0
hsa-miR-431-5p	449.951	118.078	703.781	0	0	0	1047.52	0	1982.08	268.42	0	388.192	0	224.517	555	391.742	0	892	1237.01	0
hsa-miR-432-5p	4095.19	1503.33	5300.69	5773.89	6820.43	2617.18	8559.48	3264.24	17348.8	2755.4	10406.1	7632.6	5696.55	4120.1	7152.86	6177.96	4096.81	8136.43	13664.4	7281.89
hsa-miR-433-3p	0	0	8.79726	42.308	0	0	26.2736	31.6575	62.9709	0	0	0	0	0	0	0	0	31.711	0	46.3774
hsa-miR-4429-5p	0	0	0	0	0	0	11.4233	0	0	7.83189	0	20.9535	0	23.7898	26.8321	0	19.1384	20.4587	13.3122	0
hsa-miR-4433a-5p	15.2119	0	0	0	103.532	0	0	0	0	0	0	0	0	0	0	0	0	0	0	0
hsa-miR-4433b-5p	5746.08	2728.75	3289.5	0	4329.32	1574	2727.88	2061.25	1775.78	2858.64	1896.87	0	3978.52	1464.56	915.115	2313.2	6294.14	2732.26	4443.2	0
hsa-miR-4446-3p	171.333	170.637	42.6329	46.1542	175.37	173.007	77.6784	116.077	40.1814	249.197	134.222	155.497	306.252	96.6462	56.4886	88.6235	411.475	168.784	172.034	116.897
hsa-miR-450a-3p	22.4175	0	10.8274	9.23085	0	0	0	0	0	24.9197	0	28.6733	0	0	0	0	0	28.6422	0	21.6005
hsa-miR-450b-5p	32.025	43.1992	12.1808	60.0005	61.274	64.1717	98.2404	45.7275	69.5678	74.759	96.7187	77.1972	57.6797	118.949	216.069	97.6143	0	48.078	91.1373	86.4018
hsa-miR-451a-5p	13711.5	0	36455.2	18689.4	0	28473.8	18873.6	39350.3	20330.6	11326.3	28337.6	8769.61	12397	16856.6	15648.7	0	0	14872.5	0	18178
hsa-miR-452-5p	0	33.8394	20.3014	0	0	8.72736	12.5656	0	29.3864	33.4635	20.7254	0	0	0	53.6641	38.532	0	15.344	24.5763	0
hsa-miR-454-3p	644.502	568.789	451.367	511.543	481.74	220.237	538.037	504.761	375.426	562.472	407.6	556.923	861.075	508.508	358.702	489.356	941.369	371.326	1068.05	329.725
hsa-miR-4645-3p	0	23.0396	0	0	0	13.8611	19.4196	0	9.59556	33.4635	0	0	46.6931	0	0	0	0	0	0	27.9535
hsa-miR-4662a-5p	0	15.8397	11.5041	18.4617	0	21.5617	15.9926	0	0	0	32.5685	0	0	0	0	44.954	44.2575	0	0	0
hsa-miR-4667-5p	19.215	0	10.8274	0	0	0	0	0	0	0	0	26.4676	0	77.317	0	0	0	42.9633	0	8.8943
hsa-miR-4669-3p	0	43.1992	0	0	61.274	0	28.5582	47.4862	0	0	0	0	0	0	48.0153	0	0	0	0	0
hsa-miR-4676-3p	36.8287	16.5597	12.8575	0	0	35.4228	0	0	14.3933	0	0	0	0	0	0	0	21.5307	0	0	31.7654
hsa-miR-4685-3p	52.0405	0	0	0	0	0	0	0	27.5872	0	0	0	0	162.068	0	0	0	0	18.4323	0
hsa-miR-4688-3p	0	17.2797	16.2411	0	0	0	0	0	0	0	0	0	0	0	0	57.798	0	20.4587	0	0
hsa-miR-4716-3p	0	0	0	0	0	0	0	0	20.3906	0	0	35.2902	0	0	49.4275	0	0	0	18.4323	7.62369
hsa-miR-4732-5p	903.104	0	1733.06	0	1779.06	0	3349.31	7068.41	1680.42	0	2659.76	0	0	0	3999.39	0	0	2696.46	1644.57	1027.29
hsa-miR-4738-3p	28.0218	50.399	0	0	0	65.1985	0	0	47.3781	8.54388	64.1501	18.7479	0	71.3695	56.4886	0	37.0806	32.734	14.3362	6.35307
hsa-miR-4742-3p	0	17.2797	51.4301	0	0	52.8775	0	42.21	23.3892	43.4314	20.7254	48.524	43.9464	38.6585	0	46.2384	66.9843	74.6743	26.6244	0
hsa-miR-4753-5p	0	21.5996	0	0	0	0	0	0	23.3892	0	25.6601	23.1592	0	0	48.0153	0	0	0	0	15.8827
hsa-miR-4762-3p	0	0	15.5644	0	0	11.8076	0	0	0	0	0	0	0	0	0	46.2384	0	0	0	0
hsa-miR-4772-3p	42.4331	168.477	10.8274	103.847	0	102.161	19.4196	0	64.1703	0	40.4639	0	0	0	0	0	0	65.4679	79.8731	193.133
hsa-miR-4779-3p	0	0	0	0	0	9.75411	0	43.9687	0	0	0	0	0	0	0	0	0	0	0	0
hsa-miR-483-5p	3757.33	4036.96	1122.67	2968.49	16854.6	846.04	4556.75	10916.6	2782.71	4405.8	2588.7	9704.8	4872.56	11115.8	10763.9	1733.94	11223.5	10904.5	4205.63	3142.87
hsa-miR-484-5p	2562	0	4619.24	3438.49	2560.83	3071.52	7334.9	7965.38	0	2292.61	1987.67	1622.24	3219.08	6277.54	4112.37	1506.6	2661.43	0	2347.04	2220.4
hsa-miR-485-3p	1132.88	365.753	1762.84	895.392	1172.66	794.19	828.189	158.287	1639.04	219.293	574.39	399.22	315.865	401.453	665.153	522.75	278.703	384.624	1420.31	153.744
hsa-miR-486-5p	341929	307307	706442	333207	300952	441091	385854	1.0034e+06	414230	288405	473914	200288	392262	600393	516265	352267	319948	485366	272353	224725
hsa-miR-487b-3p	49.6387	100.798	120.455	20.0002	54.9353	113.969	41.1239	0	145.133	32.0396	37.5032	13.2338	0	44.6059	0	0	0	23.5275	0	52.0952
hsa-miR-491-5p	32.025	34.5593	99.4767	62.3082	0	86.2468	34.2699	0	37.1828	62.6551	132.248	89.3282	112.613	115.975	0	43.6696	29.9037	41.9404	86.0172	74.9663
hsa-miR-493-3p	0	0	110.981	90.0007	0	29.7757	0	0	181.716	36.3115	0	0	0	26.7636	115.802	178.531	0	0	0	0
hsa-miR-493-5p	56.8443	55.439	0	0	76.0642	0	44.5509	45.7275	0	0	27.6339	0	50.813	0	0	0	144.734	79.789	149.506	24.777
hsa-miR-494-3p	123.296	15.8397	41.9562	148.463	177.483	59.038	268.448	0	218.299	64.7911	17.7647	66.1691	65.9196	28.2504	0	0	32.296	79.789	114.69	52.7305
hsa-miR-495-3p	0	0	14.8877	0	0	0	28.5582	0	22.1897	0	26.647	24.262	0	41.6322	0	0	0	0	0	0
hsa-miR-497-5p	134.505	53.279	10.8274	0	0	12.321	0	0	28.7867	0	0	0	0	0	0	0	0	31.711	18.4323	15.2474
hsa-miR-499a-5p	24.0187	30.9594	12.1808	0	0	13.3477	0	0	11.3947	0	0	29.7761	42.5731	0	0	0	46.6498	0	0	8.8943
hsa-miR-500a-3p	125.698	249.835	171.208	176.925	217.628	225.371	162.211	130.147	289.666	187.253	208.241	98.1508	92.0128	169.503	135.573	187.522	263.153	99.2248	83.9692	288.43
hsa-miR-500a-5p	0	0	16.9178	0	0	0	0	0	14.3933	0	0	0	0	0	0	0	0	25.5734	20.4803	0
hsa-miR-5010-5p	21.6168	7.91985	48.0466	52.3081	0	50.824	19.4196	43.9687	96.5554	107.511	68.0978	83.8141	109.866	0	0	0	0	63.422	67.585	28.5888
hsa-miR-501-3p	546.826	336.234	437.833	649.236	716.272	512.347	463.786	777.367	639.904	581.696	512.214	330.845	605.637	735.998	423.664	588.255	660.274	769.248	455.686	481.563
hsa-miR-502-3p	52.8412	49.6791	90.6795	0	103.532	98.0544	121.087	390.442	209.903	101.103	133.235	121.31	0	63.9352	31.0687	138.715	93.2996	114.569	134.146	214.734
hsa-miR-503-5p	72.0561	48.2391	22.3315	71.5391	179.596	139.638	0	114.319	38.3823	82.5909	213.176	66.1691	144.199	31.2242	31.0687	0	0	112.523	107.522	87.6724
hsa-miR-504-5p	28.0218	0	0	53.8466	57.0482	70.8456	85.6747	0	11.3947	0	0	13.2338	0	0	0	97.6143	0	0	17.4082	90.2136
hsa-miR-505-5p	418.726	376.553	207.074	202.309	185.935	358.848	225.039	349.991	239.289	273.404	207.254	283.424	293.892	288.452	286.679	241.467	360.041	313.018	284.676	313.207
hsa-miR-509-3p	17.6137	0	10.8274	0	57.0482	0	0	24.6225	10.795	43.4314	0	0	0	0	26.8321	0	0	0	23.5523	0
hsa-miR-517-3p	0	0	0	50.0004	54.9353	0	18.2773	0	0	0	0	0	0	0	0	0	0	0	0	0
hsa-miR-5189-5p	27.2212	0	0	0	0	0	0	70.35	38.982	0	0	0	0	20.8161	0	42.3852	59.8074	20.4587	75.7771	0
hsa-miR-518b-3p	32.8256	0	12.1808	24.6156	0	0	0	0	0	7.1199	20.7254	0	0	0	0	0	0	11.2523	0	18.4239
hsa-miR-5193-3p	51.2399	8.63984	48.7233	0	0	14.3745	25.1313	0	0	0	30.5947	73.8888	0	59.4746	0	0	0	0	0	0
hsa-miR-5194-3p	0	16.5597	10.8274	0	0	0	0	0	0	0	0	24.262	0	0	0	0	0	0	0	0
hsa-miR-5196-3p	22.4175	15.8397	8.12055	0	0	0	0	0	0	0	0	0	0	0	0	0	0	0	0	0
hsa-miR-532-3p	0	0	0	0	0	0	546.034	0	0	0	0	0	0	1024.45	611.489	0	0	0	0	0
hsa-miR-532-5p	1567.62	1396.77	1486.06	754.622	665.562	907.645	0	0	551.145	456.386	599.064	405.837	0	0	0	932.474	380.375	602.509	546.824	879.265
hsa-miR-542-3p	25.62	43.1992	0	52.3081	0	0	148.503	45.7275	0	0	0	45.2155	355.691	34.1979	0	305.687	118.419	0	141.314	0
hsa-miR-542-5p	0	0	53.4603	0	0	0	0	0	65.9695	0	0	0	0	0	38.1298	0	0	36.8257	0	170.898
hsa-miR-543-3p	37.6293	0	0	17.6925	71.8384	23.6152	0	0	11.3947	0	0	0	0	0	0	53.9448	0	0	34.8165	0
hsa-miR-543-5p	0	0	0	0	0	0	20.5619	36.9337	0	0	0	0	0	0	0	0	0	0	0	0
hsa-miR-548a-3p	30.4237	0	19.6247	0	0	0	0	0	19.1911	0	0	25.3648	0	0	0	0	0	0	0	0
hsa-miR-548au-3p	28.8225	15.8397	0	0	80.29	0	0	0	0	0	0	0	0	0	0	0	0	0	0	0
hsa-miR-548e-3p	0	0	0	0	0	21.5617	0	0	23.3892	0	0	0	0	0	0	46.2384	0	22.5046	0	29.8594
hsa-miR-548e-5p	0	27.3595	26.3918	0	0	0	26.2736	0	0	0	0	0	0	0	0	0	0	0	0	0
hsa-miR-550a-3-3p	0	0	0	0	0	42.61	38.8392	0	0	0	0	0	0	0	0	0	0	0	0	0
hsa-miR-550a-3p	0	41.7592	29.0986	0	156.354	0	0	0	23.3892	19.2237	0	0	81.0262	0	0	0	0	0	24.5763	22.8711
hsa-miR-551a-3p	44.8349	0	0	13.8463	0	115.509	0	45.7275	84.5609	0	0	0	0	0	80.4962	92.4767	0	65.4679	0	182.969
hsa-miR-5698-5p	9.60749	9.35982	14.211	0	0	0	0	0	37.1828	54.8232	96.7187	12.131	0	0	26.8321	23.1192	0	0	0	6.35307
hsa-miR-574-3p	1080.04	1489.65	951.458	1160.01	1001.51	1211.05	1146.9	1187.16	1833.35	1738.68	1049.1	923.058	1403.54	1083.92	649.619	1434.67	1979.63	948.262	1106.96	1637.19
hsa-miR-576-5p	421.128	423.352	418.885	150.001	122.548	602.701	119.945	0	322.651	242.789	409.574	135.647	126.346	218.569	159.58	136.146	29.9037	170.83	118.786	459.963
hsa-miR-582-3p	0	25.1995	27.0685	10.0001	0	189.435	0	31.6575	0	32.0396	0	41.9071	0	0	0	0	0	0	108.546	109.273
hsa-miR-584-5p	3082.4	4213.36	2927.46	3361.57	6296.43	5247.2	9327.12	7502.82	6384.05	8833.66	6157.43	9945.21	6999.84	5003.3	5620.61	6329.52	8887.39	10509.6	6000.72	5536.07
hsa-miR-589-5p	241.788	458.631	0	0	0	770.061	0	0	0	0	0	140.058	0	172.476	0	0	0	0	0	1003.15
hsa-miR-590-3p	83.2649	104.398	73.0849	60.0005	0	94.4608	0	36.9337	31.1856	61.9431	23.6862	23.1592	38.4531	38.6585	0	93.7611	0	20.4587	32.7685	28.5888
hsa-miR-607-3p	0	0	0	0	0	0	12.5656	65.0737	0	0	0	0	0	0	0	0	0	20.4587	19.4563	0
hsa-miR-616-3p	30.4237	10.7998	0	13.8463	0	0	59.4012	0	24.5886	7.83189	0	0	0	0	0	0	0	0	0	8.259
hsa-miR-625-3p	4694.86	2329.88	1500.27	2413.87	1356.48	2189.54	2517.7	2170.3	2166.8	2577.4	3958.56	3815.75	3909.86	2643.65	1776.57	2263.11	2626.74	1859.7	2276.38	1447.87
hsa-miR-627-5p	36.8287	16.5597	0	19.2309	80.29	7.70061	0	52.7625	13.1939	39.8715	50.3332	20.9535	41.1998	53.5271	0	0	37.0806	36.8257	25.6004	24.1417
hsa-miR-628-3p	300.234	462.231	290.986	412.311	219.741	626.316	462.644	205.774	639.304	682.799	636.567	529.353	306.252	410.375	282.443	449.54	645.92	541.133	576.52	517.776
hsa-miR-629-5p	1049.62	1178.62	782.28	2053.09	1688.2	1641.77	2345.2	3325.79	1585.67	1870.4	1991.61	2063.37	1954.24	2585.66	3305.99	1420.55	2271.49	2778.29	1825.82	2280.12
hsa-miR-642a-3p	0	0	0	0	234.531	58.0113	102.81	0	125.942	61.9431	158.895	234.9	111.239	81.7776	535.229	0	174.638	180.037	0	79.4134
hsa-miR-642a-5p	178.539	68.3987	55.4904	43.8465	0	0	0	0	0	0	0	0	0	0	0	0	0	0	51.2007	0
hsa-miR-643-3p	0	0	0	0	0	0	0	0	0	0	0	0	0	0	56.4886	0	0	0	21.5043	0
hsa-miR-6503-3p	44.0343	28.0795	0	0	35.9192	0	13.708	0	0	0	0	0	0	37.1716	26.8321	0	0	34.7798	0	0
hsa-miR-6507-5p	0	0	0	0	0	0	0	0	25.1884	16.3758	0	0	0	0	0	0	0	0	0	0
hsa-miR-6513-3p	0	28.7995	0	24.6156	0	33.3693	0	0	22.1897	0	0	0	0	0	0	0	25.1191	18.4128	0	40.0244
hsa-miR-651-5p	21.6168	0	13.5342	34.6157	59.1611	18.4815	0	0	9.59556	0	0	23.1592	0	0	39.542	0	0	24.5505	28.6724	0
hsa-miR-6516-5p	0	0	0	0	0	0	0	0	0	16.3758	0	0	0	0	0	0	0	0	11.2642	10.8002
hsa-miR-652-3p	296.231	449.991	324.822	201.54	114.096	356.795	139.364	453.757	264.478	191.525	253.64	121.31	105.746	243.846	152.519	294.127	139.949	309.95	386.053	318.289
hsa-miR-654-3p	337.063	201.596	0	0	781.771	0	0	145.976	1712.81	160.198	619.789	0	354.318	47.5797	405.305	0	78.9458	0	0	729.333
hsa-miR-659-5p	0	9.35982	0	0	0	9.75411	18.2773	0	10.1953	32.7515	0	0	0	0	0	0	0	21.4817	0	13.3415
hsa-miR-660-5p	0	871.904	1266.81	1846.17	1198.01	2358.44	2127.02	1908.24	1466.92	1311.49	1765.61	1935.45	1046.47	2355.19	2217.18	741.098	1168.64	2031.55	1173.52	2109.22
hsa-miR-664a-5p	0	0	476.406	1151.55	1113.5	0	1158.32	1155.5	1424.34	2108.91	1615.6	1879.2	1815.54	1101.77	1446.11	0	1472.46	2034.62	1480.72	1662.6
hsa-miR-664b-3p	55.243	0	58.1973	0	0	0	0	0	0	37.0235	56.2547	0	0	0	0	0	40.6691	0	0	0
hsa-miR-664b-5p	0	102.238	68.348	108.462	99.3061	123.723	98.2404	42.21	122.343	149.518	0	60.655	164.799	81.7776	81.9084	165.687	351.668	93.0872	131.074	139.768
hsa-miR-665-3p	0	0	0	0	0	10.7809	0	0	45.5789	0	0	0	0	31.2242	0	41.1008	0	20.4587	0	0
hsa-miR-668-3p	0	0	0	0	0	18.9948	0	0	11.9945	0	0	0	0	0	0	0	0	18.4128	30.7204	0
hsa-miR-671-3p	342.667	279.355	152.26	0	0	322.912	0	0	0	0	0	0	0	0	0	0	0	0	0	290.335
hsa-miR-671-5p	0	0	0	201.54	382.434	0	356.407	314.816	224.296	292.628	228.967	510.605	310.372	508.508	504.16	676.878	448.556	387.693	402.438	0
hsa-miR-6731-5p	0	0	0	16.9232	0	0	0	0	0	0	0	0	0	0	0	0	0	12.2752	0	16.518
hsa-miR-6734-5p	21.6168	0	54.137	0	124.661	0	68.5398	140.7	101.953	89.7108	0	52.9353	0	40.1453	59.313	0	59.8074	38.8716	0	67.3426
hsa-miR-6735-5p	27.2212	0	0	15.3847	0	0	0	35.175	44.3795	0	0	0	134.586	126.384	25.4199	0	43.0614	50.1239	0	0
hsa-miR-6747-3p	0	33.8394	26.3918	0	0	36.4496	0	0	0	0	0	0	0	0	0	0	0	0	0	24.1417
hsa-miR-6758-3p	19.215	0	0	13.8463	0	0	0	0	0	0	0	0	0	0	0	0	0	18.4128	23.5523	0
hsa-miR-6763-5p	0	0	0	30.7695	44.3708	14.8878	50.2625	29.8987	11.3947	32.7515	0	13.2338	60.4263	49.0665	53.6641	0	26.3153	0	0	12.0708
hsa-miR-676-3p	20.0156	0	18.9479	0	0	0	0	0	0	0	52.307	28.6733	0	0	0	0	0	0	0	0
hsa-miR-6780b-3p	0	35.9993	27.0685	0	0	10.7809	0	0	6.59695	0	26.647	19.8507	0	0	0	0	0	0	0	0
hsa-miR-6793-5p	0	33.1194	0	16.9232	95.0803	18.4815	0	19.3462	0	0	0	17.6451	0	0	0	107.89	0	25.5734	44.0326	0
hsa-miR-6813-5p	20.0156	18.7196	43.9863	13.077	0	24.642	0	40.4512	88.759	21.3597	31.5816	63.9634	49.4397	93.6725	0	48.8072	58.6113	0	0	10.1649
hsa-miR-6820-3p	0	0	0	0	0	23.6152	0	0	0	0	13.817	0	38.4531	0	0	0	0	0	0	0
hsa-miR-6894-5p	0	0	0	0	0	7.18724	0	35.175	11.9945	0	0	17.6451	28.8398	0	0	0	0	0	0	0
hsa-miR-7151-3p	0	0	0	27.6925	0	0	0	0	0	28.4796	0	23.1592	0	40.1453	0	35.9632	50.2383	26.5963	32.7685	26.6829
hsa-miR-744-5p	3977.5	6062.29	3173.1	6064.67	2275.59	5915.09	5143.91	3631.82	7386.78	6011.33	2342.96	6111.82	4736.6	4683.62	3361.07	4679.07	8862.27	5443.04	5341.26	4356.3
hsa-miR-7-5p	489.982	394.553	636.11	246.925	359.192	414.806	459.217	772.091	373.028	502.665	438.195	215.049	263.679	688.418	443.435	780.915	568.171	272.101	431.11	310.03
hsa-miR-760-3p	211.365	277.915	211.134	314.618	304.257	272.602	631.708	956.76	262.679	553.928	376.018	834.833	880.302	893.606	0	362.201	950.938	592.28	476.167	449.162
hsa-miR-766-3p	97.6761	0	98.8	0	0	0	0	0	0	51.9753	49.3463	0	70.0396	52.0403	67.7863	92.4767	0	0	0	86.4018
hsa-miR-766-5p	0	0	0	0	0	64.1717	0	112.56	0	0	0	51.8324	0	0	0	0	0	0	90.1133	0
hsa-miR-769-5p	378.695	179.997	303.844	320.003	133.112	538.016	99.3827	140.7	416.807	291.204	315.816	163.217	186.772	37.1716	237.252	437.98	105.261	232.206	92.1613	715.356
hsa-miR-7848-3p	32.8256	0	0	31.5387	0	8.72736	0	0	13.1939	0	0	0	0	0	0	0	0	0	38.9125	10.8002
hsa-miR-7849-3p	0	0	0	0	0	10.2675	0	0	10.795	0	0	17.6451	35.7065	0	0	0	0	15.344	22.5283	8.259
hsa-miR-7850-5p	37.6293	22.3196	10.8274	13.077	0	28.7489	0	0	7.19667	34.8875	20.7254	0	0	26.7636	0	0	0	20.4587	0	41.295
hsa-miR-7976-5p	20.0156	0	52.1069	47.6927	0	0	23.9889	49.245	20.9903	34.8875	0	0	0	40.1453	0	46.2384	84.9266	14.3211	0	22.8711
hsa-miR-885-5p	0	0	0	20.0002	0	7.18724	22.8466	140.7	112.148	0	0	0	178.532	0	0	0	58.6113	135.028	0	132.144
hsa-miR-889-3p	0	0	0	101.539	0	0	21.7043	0	101.353	15.6638	50.3332	0	0	0	50.8397	93.7611	35.8845	58.3074	71.681	53.3658
hsa-miR-92a-3p	138896	93866.8	175549	57414.3	95665.6	86450.6	102947	181019	113108	86092.4	108016	79583.7	111239	127995	88269	72512	0	96923.2	81940.6	56496.6
hsa-miR-92b-3p	445.947	416.152	406.027	0	340.176	178.654	223.897	691.188	289.666	178.71	152.973	0	0	356.848	0	364.769	232.053	210.725	336.901	104.19
hsa-miR-935-3p	0	21.5996	29.0986	52.3081	0	23.6152	0	0	12.5942	0	0	0	0	49.0665	0	0	39.4729	20.4587	0	0
hsa-miR-93-5p	18462.4	23668.8	31984.1	21262.5	11813.2	36497.8	15170.1	28665.9	32179.3	17893.7	15147.3	12461.8	14277.1	16070	17474.7	22635	19037.9	21621.8	15917.3	39732.8
hsa-miR-939-5p	0	0	0	0	0	17.9681	21.7043	0	7.7964	0	0	0	31.5865	0	0	0	0	0	0	13.3415
hsa-miR-9-3p	0	0	0	31.5387	0	0	0	0	0	0	23.6862	37.4958	0	62.4483	0	0	0	0	0	26.0476
hsa-miR-942-5p	399.511	388.793	397.907	493.85	291.58	974.384	307.287	633.15	430.601	217.869	308.908	133.441	190.892	688.418	522.519	583.117	305.018	419.404	346.117	705.191
hsa-miR-95-3p	184.944	57.5989	125.192	37.6926	80.29	17.9681	79.9631	0	52.1759	29.9036	44.4116	104.768	100.253	32.711	101.679	59.0824	0	53.1927	92.1613	48.9187
hsa-miR-9-5p	0	0	0	0	0	9.75411	25.1313	0	43.7798	19.2237	0	0	0	0	0	0	0	53.1927	0	0
hsa-miR-96-5p	659.714	52.559	495.354	96.1546	63.3869	177.627	20.5619	110.801	132.539	57.6712	148.039	33.0845	48.0664	233.438	162.405	0	142.342	99.2248	144.386	992.35
hsa-miR-98-5p	1041.61	978.462	533.926	778.468	853.61	485.138	1068.08	874.098	871.997	1206.82	997.781	1509.76	1222.26	788.038	773.893	1393.57	1526.29	786.638	1701.91	589.565
hsa-miR-99a-5p	421.128	351.353	175.269	159.232	460.611	278.249	146.218	138.941	173.92	151.654	100.666	207.33	276.038	49.0665	364.351	367.338	126.792	365.188	164.866	467.586
hsa-miR-99b-5p	2176.9	3142.74	0	0	0	0	2862.68	0	0	0	0	0	0	0	2195.99	0	0	0	1881.11	0
miR-1246-5p/URS0000A90D33_9606_Homo_sapiens_(human)_snRNA_AC024051.12	3882.22	2877.79	2546.47	130275	211102	51858.5	111002	237765	7504.33	9163.31	4854.68	16271	11498.9	137638	252887	3153.2	66423.3	123565	11735.2	5915.98
Glu-5p	357722	303996	426974	128497	1.50799e+06	371648	237035	1.93762e+06	171836	501603	587814	213084	363238	481215	517221	192784	349710	912043	284930	55849.9
Gly-5p	1.37811e+06	924235	1.75428e+06	2.06403e+06	2.44296e+06	1.14383e+06	2.04446e+06	4.02412e+06	1.17331e+06	1.44636e+06	1.58033e+06	1.00202e+06	1.97702e+06	2.58621e+06	2.70995e+06	1.06975e+06	1.21952e+06	2.36666e+06	714307	1.3919e+06
Val-5p	208651	167614	442805	98362.3	589018	177906	363296	839980	167088	144324	178563	80392.1	128330	308333	200814	114750	205772	885711	75636.8	128357
scRNA-hY4_RNA	193775	169671	75067.7	110648	47690.2	53779	113303	36300.6	55806	88894.8	38593.7	107526	269479	84831.6	52677	10401.1	189777	92245.3	50420.4	27240.1

## Sheet: Supp Table S8
Supplementary Table S8. Spearman correlation results of ELISA indexes and normalized read counts of differentially expressed sRNAs in AE Positive and AE Treated patients with respect to AE Negative.
sRNA	Spearman r*	P value
miR-122-5p	0.829	0.03
miR-1246/U2	0.775	0.05
miR-144-5p	-0.775	0.06
tRNAGly-5p	-0.703	0.09
hY4-sRNA-3p	-0.685	0.10
tRNAVal-5p	0.559	0.21
miR-485-3p	-0.430	0.33
miR-150-5p	0.252	0.59
miR-374a-5p	-0.218	0.63
miR-324-5p	-0.055	0.91
miR-483-5p	0.018	0.99
*DESEq2 vst-normalized read counts and ELISA index corresponding to Total Larva Antigens were used.

## Sheet: Supp Table S9
Supplementary Table S9. Spearman correlation results of ELISA indexes and normalized read counts of differentially expressed sRNAs in the context of CE with respect to CE Negative.
sRNA	Spearman r*	P value
miR-1246/U2	0.127	0.593
miR-125b-5p	-0.263	0.263
miR-671-5p	-0.154	0.517
miR-423-5p	0.084	0.726
miR-192-5p	0.094	0.693
miR-1-3p	-0.232	0.326
miR-431-5p	0.184	0.438
miR-125a-5p	0.016	0.947
miR-590-3p	0.034	0.886
*DESEq2 vst-normalized read counts and ELISA index were used.

## Sheet: Supp Table S10
Supplementary Table S10. Spearman correlation results of cyst size and normalized read counts of differentially expressed sRNAs in the context of CE with respect to CE Negative.
sRNA	Spearman r*	P value
miR-1246	0.538	0.014
miR-423-5p	0.574	0.008
miR-125b-5p	-0.426	0.061
miR-671-5p	0.141	0.553
miR-192-5p	-0.233	0.322
miR-1-3p	-0.273	0.245
miR-431-5p	-0.161	0.498
miR-125a-5p	-0.161	0.568
miR-590-3p	-0.083	0.769
*DESEq2 vst-normalized read counts and the longest axis of cysts measured by ultrasonography were used.
